# Supplementary material for: Critical review of multimorbidity outcome measures suitable for low-income and middle-income country settings: perspectives from the Global Alliance for Chronic Diseases (GACD) researchers
Source: PubMed Central journal article supplement (PMC7478040; doi:10.1136/bmjopen-2020-037079), 2020-09-06
Supplement: bmjopen-2020-037079.draft_revisions.pdf [file bmjopen-2020-037079.draft_revisions.pdf]

# BMJ Open

BMJ Open is committed to open peer review. As part of this commitment we make the peer review history of every article we publish publicly available.

When an article is published we post the peer reviewers' comments and the authors' responses online. We also post the versions of the paper that were used during peer review. These are the versions that the peer review comments apply to.

The versions of the paper that follow are the versions that were submitted during the peer review process. They are not the versions of record or the final published versions. They should not be cited or distributed as the published version of this manuscript.

BMJ Open is an open access journal and the full, final, typeset and author-corrected version of record of the manuscript is available on our site with no access controls, subscription charges or pay-per-view fees (<http://bmjopen.bmj.com>).

If you have any questions on BMJ Open's open peer review process please email [info.bmjopen@bmj.com](mailto:info.bmjopen@bmj.com)

# BMJ Open

## A Critical Review of Multi-Morbidity Outcome Measures suitable for Low- and Middle Income Country Settings: perspectives from the Global Alliance for Chronic Diseases (GACD) Researchers

|                               |                                                                                                                                                                                                                                                                                                                                                                                                                                                                                                                                                                                                                                                                                                                                                                                                                                                                                                                                                                                                                                                                                                          |
|-------------------------------|----------------------------------------------------------------------------------------------------------------------------------------------------------------------------------------------------------------------------------------------------------------------------------------------------------------------------------------------------------------------------------------------------------------------------------------------------------------------------------------------------------------------------------------------------------------------------------------------------------------------------------------------------------------------------------------------------------------------------------------------------------------------------------------------------------------------------------------------------------------------------------------------------------------------------------------------------------------------------------------------------------------------------------------------------------------------------------------------------------|
| Journal:                      | <i>BMJ Open</i>                                                                                                                                                                                                                                                                                                                                                                                                                                                                                                                                                                                                                                                                                                                                                                                                                                                                                                                                                                                                                                                                                          |
| Manuscript ID                 | bmjopen-2020-037079                                                                                                                                                                                                                                                                                                                                                                                                                                                                                                                                                                                                                                                                                                                                                                                                                                                                                                                                                                                                                                                                                      |
| Article Type:                 | Original research                                                                                                                                                                                                                                                                                                                                                                                                                                                                                                                                                                                                                                                                                                                                                                                                                                                                                                                                                                                                                                                                                        |
| Date Submitted by the Author: | 17-Jan-2020                                                                                                                                                                                                                                                                                                                                                                                                                                                                                                                                                                                                                                                                                                                                                                                                                                                                                                                                                                                                                                                                                              |
| Complete List of Authors:     | Hurst, John; UCL Medical School,, Academic Unit of Respiratory Medicine<br>Agarwal, Gina; McMaster University, Family Medicine<br>van Boven, Job F. M.; Univ Groningen<br>Daivadanam, Meena; Karolinska Institutet, Department of Public Health Sciences; Uppsala University , Department of Food, Nutrition and Dietetics<br>Gould, Gillian; The University of Newcastle, School of Medicine and Public Health; University of Newcastle Hunter Medical Research Institute,<br>Wan-Chun Huang, Erick ; Woolcock Institute of Medical Research, Sydney, Australia<br>Maulik, Pallab; The George Institute for Global Health,<br>Miranda, J. Jaime; Universidad Peruana Cayetano Heredia, CRONICAS Centre of Excellence in Chronic Diseases<br>Owolabi, M. O.; University of Ibadan College of Medicine, Medicine<br>Premji, Shahirose ; York University,<br>Soriano, Joan; Universidad Autónoma de Madrid,<br>Vedanthan, Rajesh; NYU Langone Health,<br>Yan, Lijing; Global Health Research Center, Duke Kunshan University, Kunshan, Jiangsu, China<br>Levitt, Naomi; University of Cape Town , medicine |
| Keywords:                     | PRIMARY CARE, PUBLIC HEALTH, STATISTICS & RESEARCH METHODS, Clinical trials < THERAPEUTICS                                                                                                                                                                                                                                                                                                                                                                                                                                                                                                                                                                                                                                                                                                                                                                                                                                                                                                                                                                                                               |
|                               |                                                                                                                                                                                                                                                                                                                                                                                                                                                                                                                                                                                                                                                                                                                                                                                                                                                                                                                                                                                                                                                                                                          |

SCHOLARONE™  
Manuscripts

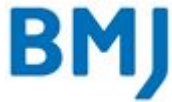

I, the Submitting Author has the right to grant and does grant on behalf of all authors of the Work (as defined in the below author licence), an exclusive licence and/or a non-exclusive licence for contributions from authors who are: i) UK Crown employees; ii) where BMJ has agreed a CC-BY licence shall apply, and/or iii) in accordance with the terms applicable for US Federal Government officers or employees acting as part of their official duties; on a worldwide, perpetual, irrevocable, royalty-free basis to BMJ Publishing Group Ltd ("BMJ") its licensees and where the relevant Journal is co-owned by BMJ to the co-owners of the Journal, to publish the Work in this journal and any other BMJ products and to exploit all rights, as set out in our [licence](#).

The Submitting Author accepts and understands that any supply made under these terms is made by BMJ to the Submitting Author unless you are acting as an employee on behalf of your employer or a postgraduate student of an affiliated institution which is paying any applicable article publishing charge ("APC") for Open Access articles. Where the Submitting Author wishes to make the Work available on an Open Access basis (and intends to pay the relevant APC), the terms of reuse of such Open Access shall be governed by a Creative Commons licence – details of these licences and which [Creative Commons](#) licence will apply to this Work are set out in our licence referred to above.

Other than as permitted in any relevant BMJ Author's Self Archiving Policies, I confirm this Work has not been accepted for publication elsewhere, is not being considered for publication elsewhere and does not duplicate material already published. I confirm all authors consent to publication of this Work and authorise the granting of this licence.

# A Critical Review of Multi-Morbidity Outcome Measures suitable for Low- and Middle Income Country Settings: perspectives from the Global Alliance for Chronic Diseases (GACD) Researchers

John R Hurst, Gina Agarwal, Job F M van Boven, Meena Daivadanam, Gillian S Gould, Erick Wan-Chun Huang, Pallab K Maulik, J Jaime Miranda, Mayowa O Owolabi, Shahirose Sadrudin Premji, Joan B Soriano, Rajesh Vedanthan, Lijing L Yan, Naomi S Levitt \*

**\*: on behalf of the GACD Multi-Morbidity Working Group contributors:**

Ricardo Araya, Kirsten Bobrow, Niels H Chavannes, F Xavier Gómez-Olivé, Shabbar Jaffar, Bruce J Kirenga, Rianne M J J van der Kleij, Muralidhar M Kulkarni, Laura Loli-Dano, Patricio Lopez-Jaramillo, Shane Norris, Josefien van Olmen, Gary Parker, Trishul Siddharthan, Kamran Siddiqi, Najma Siddiqi, Antigona C Trofor

**Corresponding Author:**

John R Hurst  
Professor of Respiratory Medicine  
UCL Respiratory  
University College London  
London  
UK

[j.hurst@ucl.ac.uk](mailto:j.hurst@ucl.ac.uk)

## Funding

The article was supported by the Global Alliance for Chronic Diseases (GACD) secretariat. The Authors are investigators on individual studies funded in collaboration with the GACD.

## Conflict of Interest

The Authors have no conflicts of interest to declare in relation to this work.

**KEYWORDS:** Multimorbidity; Outcome Assessment, Health Care;

**WORDCOUNT:** 4672

## Abstract

*OBJECTIVES: There is growing recognition around the importance of multi-morbidity in low- and middle-income country (LMIC) settings, and specifically the need for pragmatic intervention studies to reduce the risk of developing multi-morbidity, and of mitigating the complications and progression of multi-morbidity in LMICs. One of many challenges in completing such research has been the selection of appropriate outcomes measures. A 2018 Delphi exercise to develop a core-outcome set for multi-morbidity research (COSmm) did not specifically address the challenges of multi-morbidity in LMICs where the global burden is greatest, patterns of disease often differ and health systems are frequently fragmented. We therefore aimed to summarise and critically review outcome measures suitable for studies investigating mitigation of multi-morbidity in low- and middle-income country (LMIC) settings..*

*SETTING: LMIC*

*PARTICIPANTS: people with multi-morbidity.*

*OUTCOME MEASURES: identification of all outcome measures*

*RESULTS: We present a critical review of outcome measures across eight domains: mortality, quality of life, function, health economics, health-care access and utilization, treatment burden, measures of 'healthy living', and self-efficacy and social functioning.*

*CONCLUSIONS: Studies in multi-morbidity are necessarily diverse and thus different outcome measures will be appropriate for different study designs. Presenting the diversity of outcome measures across domains should provide a useful summary for researchers, encourage the use of multiple domains in multi-morbidity research, and provoke debate and progress in the field*

*TRIAL REGISTRATION: Not applicable.*

## Strengths and Limitations

- There is no existing review of outcome measures suitable for use in studies to mitigate multi-morbidity in LMIC settings.
- The article is the written by the Global Alliance for Chronic Diseases researchers.
- It is not a systematic review.
- Further work is required to develop a core-outcome set for use in LMIC.

## Introduction

There is growing recognition around the importance of multi-morbidity in low- and middle-income countries (LMICs) [1]. Multi-morbidity, as defined by the United Kingdom Academy of Medical Sciences (AMS) refers to “*the co-existence of two or more chronic conditions, each of which is either a physical non-communicable disease of long duration, a mental health condition of long duration, or an infectious disease of long duration*” [1]. The AMS report highlights challenges in delivering multi-morbidity research [2], including the selection of appropriate outcome measures. In 2018, Smith completed a Delphi exercise to develop a core-outcomes set for multi-morbidity research (COSmm) [3]. The highest scoring outcomes were health-related quality of life, mental health outcomes and mortality. Whilst ground-breaking, this process did not specifically target the challenges of multi-morbidity in LMICs where the global burden is greatest, patterns of disease often differ and health systems are frequently fragmented.

The Global Alliance for Chronic Diseases (GACD) is an alliance of health-research funders, whose research teams form a network of multidisciplinary researchers from both LMICs and high-income countries (HICs). We aim to reduce the impact of non-communicable diseases (NCDs) through a focus on implementation science research in LMICs, and high-priority populations in HICs. Recognizing synergies across our disease-specific programmes, in 2017 we formed a Multi-Morbidity Working Group and published a GACD Researchers’ Statement concluding that “*a greater focus on multi-morbidity is overdue and necessary to successfully improve global health outcomes*”, thus acknowledging the specific challenge of multi-morbidity in the LMIC context [4]. The statement went on to propose three strategic objectives, one of which was to change the way research is commissioned, funded and delivered when considering NCDs in LMICs.

Discussion with research funders subsequently highlighted that one barrier to funding research addressing multi-morbidity in LMICs was a perceived lack of robust outcome measures. We have therefore developed this GACD Researchers’ perspective on outcome measures suitable for studies of multi-morbidity in LMICs, taking into account the challenges of (routine) data collection, and patient-provider factors such as differences in interpreting social constructs and health literacy. The intent is to build on the COSmm work [3]. Derived from a common base of expertise in NCD implementation research in LMICs, we present a diversity of potential measures that can accommodate different aspects of impact in LMICs, ranging from individual level outcomes to health service and health system effects. This is not an attempt to provide a core outcome measures set. Rather, together, the potential outcome measures inform different evaluations of effectiveness and/or process for multi-morbidity. We present these as a useful resource for those designing and reviewing intervention studies for multi-morbidity in LMIC settings, and hope this initiative may promote harmonization across studies that will be essential to better map the impact of multi-morbidity in LMIC settings.

## Method

Potential outcome measures suitable for studies of multi-morbidity in LMICs were collected through a survey among the GACD multi-morbidity working group, and distilled by the writing committee (the Authors) into categories. All measures had to be suitable for use in multi-morbidity intervention studies in LMIC, either at the individual or the population level, and from an implementation science perspective. Criteria for suitability included ease of measurement, generalizability and statistical considerations. Each outcome approach is fully described below. The initial synthesis was reviewed by members of the GACD Multi-Morbidity Working Group for additional comments and suggestions (the Contributors). The resulting narrative review summarizes the group's collective thoughts within each domain of outcome measures studied.

### Patient and Public Involvement

Patients or the public were not involved in the design, conduct, reporting, or dissemination plans of our research.

## Outcome Measures for Multi-Morbidity Interventions in LMIC

### 1. Mortality

Death is the final common outcome for all individuals. Thus (premature) mortality is the most broadly applicable, generalizable, and comparable outcome for multi-morbidity research. Indeed, mortality was considered as an "essential" core outcome measure for multi-morbidity research according to the COSmm consensus [3].

However, precisely because mortality is so broadly applicable, it suffers from a lack of specificity. While cause-specific mortality is a potential solution to the issue of specificity, this approach moves away from the goal of multi-morbidity-based outcome consideration. In addition, mortality does not reflect the quality of life that an individual experiences during the time of survival; particularly in the context of multi-morbidity, both disability and quality-of-life considerations are important in terms of an individual's experience of illness, wellness and life. Indeed, death is not always the most important outcome from a patient-centered perspective, as has been demonstrated in studies assessing patient preferences of different potential health outcomes [5-7] and conceptualized as Disability-Adjusted Life Years.

Practical challenges with mortality as an outcome measure include statistical power and sample size for an outcome that is relatively rare compared to other outcomes and proxies, potentially requiring much longer follow-up periods, except for older and/or more severely affected populations. It is, however, generally easy to measure and while the primary cause may be ascertained through techniques such as verbal autopsy (2016 WHO VA standard) [8], assessing the contribution of multi-morbidity at verbal autopsy is more challenging. Whilst misclassifying the cause of death can impact the effect size for cause-specific mortality, power will be preserved for all-cause mortality. In some LMICs, ascertainment of deaths remains difficult due to the lack of mature vital registry systems and cultural traditions promoting deaths at home with delay in reporting.

1  
2  
3 Thus, mortality as an outcome for multi-morbidity research has been infrequently utilized,  
4 particularly in the context of LMIC settings [9-11]. Demographic surveillance sites that have a  
5 long record of verbal autopsy could, however, provide a useful data reservoir to examine  
6 associations between multi-morbidity and mortality  
7  
8  
9

## 10 **2. Generic Quality of Life scales**

11 Health-related quality of life (HRQoL) instruments measure multidimensional wellbeing and  
12 functioning. Such scales may be generic such as EQ-5D and SF-36, or disease (/area) specific.  
13 While disease-specific measures may have better content and face validity as well as better  
14 responsiveness and sensitivity to change compared to generic measures, generic measures are  
15 (by definition) not disease specific and likely better for comparison of HRQoL among different  
16 diseases and for diseases in combination, an important consideration for multi-morbidity  
17 research.  
18  
19  
20

21 Among generic tools, the COSmm consensus [3] ranked the EQ-5D, SF36 and '12, and Global  
22 quality of life (WHOQOL-BREF) most highly  
23  
24

25 The EQ-5D [12] has been widely used since introduction in the 1990s, facilitating health-  
26 economic analysis (see below). It is designed to be completed by the participant and is  
27 available in multiple languages and thus widely applicable. The EQ-5D questionnaire has two  
28 components (health-state description and evaluation). In the health state description, health  
29 status is measured across five dimensions: mobility, self-care, usual activities, pain/discomfort,  
30 and anxiety/depression. In the evaluation section, the respondents evaluate their overall health  
31 status using a visual analogue scale.  
32  
33

34 The SF-36 [13] has 36 questions across eight domains: vitality, physical functioning, bodily pain,  
35 general health perceptions, physical role functioning, emotional role functioning, social role  
36 functioning and mental health.  
37  
38

39 The WHOQOL-BREF [14] is an abbreviated version of the WHOQOL-100 quality of life  
40 assessment, originally developed by the WHOQOL Group working across fifteen international  
41 field centers to develop a quality of life assessment applicable across multiple settings.  
42  
43

44 HRQoL tools have a number of advantages over mortality as an outcome, being amenable to  
45 changes in the short term. HRQoL outcomes are particularly meaningful as the aim of clinical  
46 treatment and management is generally optimizing quality of life. Consequently, managing  
47 multi-morbidity needs to take quality of life into account both as an outcome marker, but also an  
48 input factor into formulating clinical management. Practical considerations in LMIC include the  
49 availability of valid translations in local languages, and the challenges of use in populations with  
50 low literacy or understanding of visual-analogue scales. Other unanswered questions include  
51 whether thresholds for minimum clinically important differences on these scales should be  
52 altered in the context of multi-morbidity. Notably, some common NCDs such as hypertension  
53 are not generally associated with significant symptom burden.  
54  
55  
56  
57  
58  
59  
60



### **3. Multi-dimensional indices of function**

The AMS [1] recommended that reports of multi-morbidity should provide details of functional deficits, or disabilities and frailty. In both instances the recommendation was made that this should be coded using a standardized classification scheme. For the former, the WHO Disability Assessment Schedule 2.0 (WHODAS 2.0) or the International Classification of Functioning, Disability and Health (ICF) were suggested. For the latter, the cumulative deficit model of frailty or Fried's phenotype model was recommended (see below).

#### **WHO Disability Assessment Schedule**

The WHODAS 2.0 has been widely used in epidemiological and observational studies in LMICs. It is a self-administered 12 item questionnaire that assesses six different adult life tasks over the preceding month. The specific areas covered are 1) understanding and communication; 2) self-care; 3) mobility; 4) interpersonal relationships; 5) work and household roles and 6) community and civic roles. WHODAS has been included as a secondary outcome measure in three multi-morbidity trials in LMIC (currently unreported [15-17]).

#### **Frailty assessment instruments:**

There are many methods to assess frailty including the Fried Index, the Frailty Index and the British Frailty Index. While these have been used to examine the prevalence, correlates or outcomes of frailty in LMIC, further validation is still required in these settings [18]. Of the various metrics, the Fried Index [19] has been the most commonly used in LMIC. This index measures frailty by the presence of three or more of five physical deficits - exhaustion, weakness, slowness, low levels of activity and weight loss. Three of the items are collected using questionnaires, but slowness is assessed using a walking test and weakness by assessing grip strength. The Frailty Index has also been commonly used in LMICs and uses the presence or absence of medical conditions or poor performance on functional tasks to assess the number of deficits present and thus frailty [18]. Using frailty as an outcome measure for intervention studies in patients with multi-morbidity in LMIC is limited by factors such as a lack of equipment, and the question remains as to how susceptible to change such measurements are, and what a minimum clinically important difference (MCID) might be. Despite this, frailty instruments remain an important outcome in LMIC settings given that frailty may be a confounding factor in self-care, treatment adherence and family burden.

#### **Assessment of physical functioning:**

Physical functioning measures are commonly studied outcomes. The most frequently used indices include activities of daily living (such as eating, dressing and toileting), instrumental activities of daily living (such as shopping and answering phone calls), and the Barthel Index (self-reported outcomes on degree of assistance needed for mobility, self-care and continence). Smith [3] described activities of daily living, physical function and physical activity as core outcomes in multi-morbidity interventions. For ADL the following measures received greatest support: Frenchay Activities Index (FAI), Nottingham Extended Activities of Daily Living (NEADL) and the Instructions for Activities of Daily Living questionnaire (ADL/ IADL), but these have not been evaluated in the context of LMICs.

1  
2  
3 The modified Rankin Scale is an example of a disease-specific (in this case, stroke) composite  
4 outcome measure including rating of functioning from no interference with daily life, through  
5 various degrees of disability to death. These outcomes are relatively easy to assess and have  
6 particular relevance in LMICs as people generally express strong desires in maintaining  
7 physical functioning including their ability to work, avoiding financial consequences and burden  
8 on family caregiving.  
9  
10

#### 11 12 13 **4. Health Economic indices**

14 The AMS report [1] highlighted the economic burden of multi-morbidity in LMICs and thus health  
15 economic indices are a rational choice as multi-morbidity outcome measures. However, most  
16 economic data on multi-morbidity were gathered in HICs and the question arises as to whether  
17 measurement instruments, data and outcomes commonly used to assess cost implications of  
18 multi-morbidity in HICs are applicable to LMIC settings.  
19  
20

21 One of the most common economic evaluations of healthcare interventions makes use of a  
22 technique called cost-effectiveness analysis and specifically the *incremental cost-effectiveness*  
23 *ratio* (ICER) [20]. The method to calculate the ICER is not disease specific, making it just as  
24 suitable to assess multi-morbidity interventions as single disease interventions. However, it  
25 requires specific attention to the definitions and collection of costs and effect data in LMICs.  
26 Within this ratio, costs and effects can be defined, measured, and calculated in different ways,  
27 of which some are more suitable in economic assessment of multi-morbidity interventions in  
28 LMICs than others. Interpretation of the ratio may differ in different settings.  
29  
30

31  
32 In healthcare, interventions can impact different types of direct and indirect costs within and  
33 outside healthcare systems. The different costs to be included in cost-effectiveness analysis  
34 depends on the perspective that is taken (e.g. the healthcare payer, the society, the patient, or  
35 the family). Costs that directly result from the intervention and that which occur within  
36 healthcare systems should be included when a healthcare payer perspective is taken.  
37 However, in LMICs that lack universal health coverage, the perspective of the patient and family  
38 may be more relevant and a key focus could be on out-of-pocket costs. Examples of indirect  
39 costs are work productivity losses and these costs are especially relevant when a patient or  
40 societal perspective is taken.  
41  
42  
43

44 In health economic studies, the effect of intervention uses a measure that is independent of a  
45 specific disease: the quality-adjusted life year (QALY). The QALY is a combination of utility  
46 (preferably measured using the EQ-5D) and survival. With the EQ-5D, certain health states are  
47 defined, to which a specific utility is assigned. Utility is the value a society gives to a specified  
48 health state and for each country a specific algorithm should be estimated from large general  
49 population samples. In many LMIC settings these still need to be further developed to allow for  
50 generalizable models of effectiveness.  
51  
52  
53

54 While most HICs have defined guidelines and make use of fixed thresholds or ranges to assess  
55 whether a certain ICER is considered cost-effective, such guidelines and thresholds are  
56  
57  
58

1  
2  
3 generally lacking in LMICs. This complicates the interpretation of cost-effectiveness analyses in  
4 LMICs. As a general rule, the World Health Organization (WHO) defines an intervention that  
5 costs less than three times the gross domestic product per capita as cost-effective [21]. It is  
6 important to note that the economic analyses discussed here are not specific to multi-morbidity,  
7 but are nonetheless suitable for the study of multi-morbidity.  
8  
9

## 10 11 12 **5. Health Care Access and Utilization**

13 Multi-morbidity is associated with repeated care seeking, often at different providers. This not  
14 only results in multiple interactions with health care settings through outpatient and inpatient  
15 admissions but also involves para-medical services and practitioners of traditional medicine.  
16

17  
18 Although we identified no study that has specifically looked at generating or testing multi-  
19 morbidity related healthcare access indices in LMICs, the WHO Study on Global Ageing and  
20 Adult Health (SAGE) which focused on LMICs tracked indicators specific to multi-morbidity in  
21 ageing populations [22, 34]. These included the number of outpatient visits in the last 12  
22 months, overnight hospital stays in the past three years, and the number of overnight stays in  
23 hospital in the past 12 months. A UK National Health Service document [24] outlines equity  
24 indicators that may also map multi-morbidity relevant in LMIC settings, and some of these have  
25 direct healthcare access relevance such as emergency hospitalizations for chronic conditions  
26 and repeat emergency hospitalizations in the same year. Access to medicines listed on the  
27 WHO Essential Medications list would provide another metric, as would recommendations on  
28 attention to comorbidity and pharmacological interactions in treatment guidelines.  
29  
30  
31

32 This lack of LMIC specific multi-morbidity indices to plot healthcare access leads to a critically  
33 important avenue of research that could draw on that conducted in HICs [25]. The latter work  
34 lists a range of objectives that need to be addressed in healthcare practices catering to clients  
35 with multi-morbidity and lists a set of preventive services for such cases which health facilities  
36 should provide. Health-seeking behaviour is a further dimension related to healthcare access  
37 that is shaped by unique socioeconomic and cultural contexts faced by patients in LMICs. We  
38 suggest it would be useful to develop health-seeking behaviour indices relevant across LMICs.  
39 This needs a contextual framework to best understand what is feasible and what can be tracked  
40 within specific LMIC settings, acknowledging the challenges introduced by the fragmentation of  
41 care and the multiplicity of levels of provision of care in the public and private sectors. Such  
42 indices could be linked with existing monitoring frameworks used to assess Universal Health  
43 Coverage [26].  
44  
45  
46  
47

48 The Global Burden of Disease initiative has recently incorporated a new metric at national level  
49 termed the Healthcare Access and Quality (HAQ) Index [27]. The HAQ index is a scale from 0  
50 to 100, calculated by measuring mortality rates from causes that should not be fatal (amenable  
51 mortality) in the presence of effective medical care. This correlates with the Socio-demographic  
52 Index, a measure of overall development consisting of income *per capita*, average years of  
53 education, and total fertility rates.  
54  
55  
56  
57  
58  
59  
60

## **6. Treatment burden**

The burden of treatment, a relatively new concept, emerged from disease-centered healthcare systems in response to the growing needs of coping with chronic conditions. In the context of multi-morbidity, this may be considered as the workload and impact on a patient as a result of receiving medical care [28]. High treatment burden may lead to overwhelmed patients who struggle to access healthcare and adhere to suggested treatment whilst coordinating their own care and other aspects of life, a particular issue among patients with multi-morbidity. As a consequence, polypharmacy and non-adherence to treatment and poor clinical outcomes may follow, resulting in an even higher burden of treatment, a deterioration cycle depicted in the Cumulative Complexity Model [29]. Therefore, assessing treatment burden is a priority in order to achieve better quality healthcare, and treatment burden is a potential outcome measure in interventions directed against multi-morbidity. There is also the challenge, more pronounced in LMICs, that in areas of no care there can be no 'burden' from treatment which it is impossible to access.

Assessing the burden of treatment is not an easy task. It generally requires multi-dimensional measures that are tailored to the medical condition(s), health system(s) and cultural background. Tailoring to specific conditions may diminish value in multi-morbidity. Eton proposed a conceptual framework of treatment burden based on qualitative inquiries to patients with chronic conditions, consisting of three themes and 15 subthemes [30]. A number of tools for evaluating treatment burden for patients with multi-morbidity have been developed in the past few years. Eton designed and validated the Patient Experience with Treatment and Self-management (PETS) [31]. The Treatment Burden Questionnaire (TBQ) is another instrument, consisting of 15 items [32] and later further adapted [33, 34]. In 2018, Duncan published the Multimorbidity Treatment Burden Questionnaire (MTBQ), a ten-item measure initially validated in primary care in the United Kingdom [35]. The Healthcare Task Difficulty (HCTD) questionnaire is an 11-question tool designed to measure only one aspect – perceived difficulty in performing healthcare management tasks [36]. Finally, the Multi-morbidity Illness Perceptions Scale (MULTIPLes), unlike other instruments, was designed to measure the perceived impact of multi-morbidity [37]. The scale includes treatment burden (six questions) as one of the subscales.

As these questionnaires are relatively new, validation and translation for different populations and geographic areas remain limited, especially in LMICs. Exploring the notion and measurement of treatment burden in LMIC remains relatively unexplored [34, 38].

There are a number of remaining issues to be considered before applying these tools in LMICs. Firstly, the strengths and limitations of each tool should be examined as careful validation has often not been conducted in such settings. Secondly, using mixed methods may help identify relevant issues relating to differences in contexts, cultures and health system structures. Thirdly, as all of these instruments have been available for less than a decade, longitudinal evidence of change over time is absent.

## 7. Measures of 'Healthy Living'

Multi-morbidity is complex to operationalize, which makes common denominators very relevant. Measures of 'Healthy Living' are direct common denominators for being at risk of developing individual components of multi-morbidity, and thus measuring change in these measures provides potential generic outcomes of interventions to mitigate future multi-morbidity. Most current behavioral interventions have targeted only one behaviour at a time.

Healthy living encompasses many different aspects of health and wellbeing, including diet, physical activity including sedentary behaviour, tobacco and alcohol consumption, developing health literacy, maintaining good hygiene, and sanitation. Most current behavioral interventions have targeted only one behaviour at a time.

*Diet:* Dietary assessments are complex. Self-reported dietary intake measurements are the most common form of dietary assessments, which include prospective recording of actual food consumed or retrospective recall [39, 40]. With respect to multi-morbidity, the focus must be on long-term usual intake. Dietary diversity scores are one such measure that can be estimated for the individual, or the household using counts of food items (food variety score) or food groups (dietary diversity score) consumed over a pre-specified period [41, 42]. Dietary diversity can be estimated at the Household level using the Household Dietary Diversity Score (HDDS), which assesses household access to a variety of foods, or at individual level for women and children respectively using the Minimum Dietary Diversity for Women of Reproductive Age tool (MDD-W) and WHO Infant and Young Child Minimum Dietary Diversity Tool (IYCF-MDD) [43].

*Physical activity (PA) including sedentary behaviour:* Convincing interventional evidence showing a clear dose-response relationship between PA and improved health outcomes comes mainly from HICs, although associations of PA with reduced cardiovascular mortality and morbidity are available globally [44]. Sedentary behaviour, defined as those that involve sitting or reclining and low levels of energy expenditure during waking hours [45], has also been associated with having at least two morbidities, independent of light, moderate or vigorous PA [45, 46] in HICs and LMICs. The global physical activity questionnaire (GPAQ) that is part of the WHO STEPwise Approach to Chronic Disease Risk Factor Surveillance data collection tool [47] is a commonly used tool to collect self-reported data on PA. The GPAQ which is a shorter (16-item) version of the longer International Physical Activity questionnaire (IPAQ) also assesses sitting time in addition to PA in three domains (work, travel and leisure-time). This is used to estimate the duration of moderate to vigorous physical activity (MVPA) or intensity in terms of MET (metabolic equivalent)-minutes per week of total and domain-specific activities. However, agreement between PA estimated by GPAQ and more objective measures has been moderate at best. Objective measures of PA allow real-time monitoring and can be easily completed using an application on a mobile device or a wearable pedometer or accelerometer, although this has mostly been tested in HIC settings. Considering the rapid acceleration of smart phone ownership in LMIC, and the availability of cheaper but robust wearable devices, these are now viable options and an optional tool to capture objective PA has since been incorporated into the GPAQ.

1  
2  
3 *Tobacco and alcohol use:* Tobacco use has been consistently linked as a causative factor for  
4 chronic respiratory disorders such as chronic obstructive pulmonary disease, cardiovascular  
5 disease and many cancers including lung cancer. Similarly, alcohol use has strong associations  
6 with NCDs. Ever and current use of tobacco or current use of alcohol are commonly used  
7 assessments in addition to questions focusing on frequency and amount of consumption, and  
8 these are part of the WHO STEPS instrument [47]. Where available, verification of smoking  
9 status can be achieved through measurement of carbon monoxide or urinary cotinine.  
10 Assessment of household, environmental and occupational airborne exposures are more  
11 complex.  
12  
13  
14

15 *Healthy living index:* In addition to individual risks and behaviors, composite indicators that  
16 assess healthy living may be more relevant in the context of multi-morbidity. Tools to assess  
17 the environment in terms of its potential to offer opportunities for healthy living have been  
18 limited, especially in LMICs. Environmental Profile of a Community's Health (EPOCH) is a  
19 quantitative tool designed to capture community perceptions of tobacco, nutrition, and social  
20 environments, validated in five countries (China, India, Brazil, Colombia, and Canada) [48, 49].  
21 EPOCH comprises an objective assessment of the physical environment, and an interviewer-  
22 administered questionnaire on residents' perceptions of their community to capture both  
23 objective and subjective measures of the environment [48]. The Community Healthy Living  
24 Index (CHLI), developed in the US assessed the environmental support potential of a  
25 community across five domains assessing a specific venue: schools, afterschool child care  
26 sites, work sites, neighborhoods, and communities-at-large [50]. Such tools could be adapted  
27 for use in LMICs.  
28  
29  
30  
31  
32  
33

### 34 **8. Self-efficacy and social functioning**

35 Self-efficacy and social functioning relate to social determinants of health such as age, gender,  
36 marital status, family background, employment, education level and socioeconomic status [51-  
37 57], affecting in turn how an individual is able to look after their health conditions (self-efficacy)  
38 and interact in society with other individuals leading a fulfilling life (social functioning). This  
39 raises the important question of whether indices of self-efficacy and social functioning may be  
40 suitable as outcomes measures in studies to mitigate multi-morbidity in LMIC settings.  
41  
42

43 There are limited studies that explore which social determinants are more influential than others  
44 in determining self-efficacy and social functioning. Positive personality traits and higher self-  
45 esteem demonstrated in adolescence positively affect self-efficacy [58]. Competent behaviour,  
46 such as skills of focusing on others' well-being, affiliative behaviours/interpersonal cooperation  
47 and participation, which are culturally valued and socially competent are associated with higher  
48 self-efficacy [59-60]. Liebke and colleagues [61] reported that loneliness and social functioning  
49 are associated. Loneliness may be caused by impaired social skills, such as maintaining  
50 conversations or expressing feelings, which are essential to adequate social functioning [61].  
51 Values placed on social determinants of health may vary across different cultures. Differences  
52 in cultural traditions may affect the sources of self-efficacy belief systems [51, 54, 55].  
53  
54  
55  
56  
57  
58  
59  
60

1  
2  
3 Given the multitude of cultural factors affecting the precursors of self-efficacy and social  
4 functioning, populations in LMICs may have fewer opportunities to develop such skills.  
5 Therefore, whilst measures of self-efficacy and social functioning could be used as multi-  
6 morbidity outcome measure in LMIC, a single index is unlikely to be useful across all settings.  
7  
8  
9

## 10 **Conclusions**

11 The case has been made for the growing global importance of multi-morbidity, the need for  
12 pragmatic intervention studies to reduce the risk of developing multi-morbidity in LMIC settings,  
13 and of mitigating the complications and progression of multi-morbidity. One of many challenges  
14 in such research has been the selection of appropriate outcomes measures.  
15  
16  
17

18 We present the GACD Researchers' perspective on outcome measures suitable for multi-  
19 morbidity intervention studies in the context of LMICs. We have considered outcome measures  
20 across eight domains (Figure 1). Some represent direct measurements of clinical outcomes,  
21 whilst others represent intermediate variables on the pathway to multi-morbidity. Some  
22 measures are single, others are composite. They vary in their ease of collection. It is critical to  
23 choose appropriate outcomes for the study design selected in order to demonstrate and  
24 understand the effect of an intervention. Studies in multi-morbidity are necessarily diverse and  
25 thus different outcome measures will be appropriate for different study designs. As with the  
26 COSmm consensus [3], we recognize the importance of mortality and health-related quality of  
27 life as multi-morbidity outcomes, and these are suitable for use in LMIC settings. Many other  
28 outcomes from the COSmm work, including patient-reported impacts and behaviors (such as  
29 treatment burden and self-efficacy); physical activity and function, and health systems indicators  
30 (notably health economic indices) are also suitable for LMIC settings, though in the context and  
31 with the caveats that we have described above.  
32  
33  
34  
35

36 The diversity of outcome measures across domains demonstrated here should provide a useful  
37 summary for researchers, and encourage the use of multiple domains in multi-morbidity  
38 research, rather than just a single outcome measure. Ultimately, the proof of utility for these  
39 outcome measures will be the demonstration that an effective multi-morbidity intervention can  
40 improve the health of the community in which it is tested. Meanwhile, there remains the urgent  
41 need for further study and development of outcome measures suitable for multi-morbidity  
42 intervention studies in the context of LMIC.  
43  
44  
45

46 This work is not intended to be a core outcome set, nor a systematic review. Instead, we  
47 present a critical, narrative synthesis describing the range of outcome measures that might be  
48 selected for use in such settings, and their challenges. We anticipate this will be useful to other  
49 researchers designing and conducting such studies, and to provoke debate and progress in the  
50 field.  
51  
52  
53  
54  
55  
56  
57  
58  
59  
60

## Figure Legend

**FIGURE 1:** *Eight domains of outcome measures for multi-morbidity interventions in LMIC.*

## References

1. Academy of Medical Sciences. Multimorbidity: a priority for global health research: Full report. Available at <https://acmedsci.ac.uk/policy/policy-projects/multimorbidity> last accessed 1st August 2019.
2. Academy of Medical Sciences. Advancing research to tackle multimorbidity: the UK and LMIC perspectives workshop report. Available at <https://acmedsci.ac.uk/policy/policy-projects/multimorbidity> last accessed 1st August 2019.
3. Smith SM, Wallace E, Salisbury C, Sasseville M, Bayliss E, Fortin M. A Core Outcome Set for Multimorbidity Research (COSmm). *Ann Fam Med*. 2018 Mar;16(2):132-138
4. Hurst JR, Dickhaus J, Maulik PK, Miranda JJ, Pastakia SD, Soriano JB, Siddharthan T, Vedanthan R; GACD Multi-Morbidity Working Group. Global Alliance for Chronic Disease researchers' statement on multimorbidity. *Lancet Glob Health*. 2018 Dec;6(12):e1270-e1271.
5. Vaanholt MCW, Kok MM, von Birgelen C, Weernink MGM, van Til JA. Are component endpoints equal? A preference study into the practice of composite endpoints in clinical trials. *Health Expect*. 2018 Dec;21(6):1046-1055. doi: 10.1111/hex.12798. Epub 2018 Aug 14. PubMed PMID: 30109764; PubMed Central PMCID: PMC6250862
6. van Summeren JJ, Schuling J, Haaijer-Ruskamp FM, Denig P. Outcome prioritisation tool for medication review in older patients with multimorbidity: a pilot study in general practice. *Br J Gen Pract*. 2017 Jul;67(660):e501-e506. doi: 10.3399/bjgp17X690485. Epub 2017 Mar 27. PubMed PMID: 28347987; PubMed Central PMCID: PMC5565860
7. Fried TR, Tinetti M, Agostini J, Iannone L, Towle V. Health outcome prioritization to elicit preferences of older persons with multiple health conditions. *Patient Educ Couns*. 2011 May;83(2):278-82. doi: 10.1016/j.pec.2010.04.032. Epub 2010 May 31. PubMed PMID: 20570078; PubMed Central PMCID: PMC2945432
8. WHO. Verbal autopsy standards: ascertaining and attributing causes of death. Available at <https://www.who.int/healthinfo/statistics/verbalautopsystandards/en/> last accessed 1st August 2019.
9. Garvey J, Connolly D, Boland F, Smith SM. OPTIMAL, an occupational therapy led self-management support programme for people with multimorbidity in primary care: a randomized controlled trial. *BMC Family Practice* 2015;16:59.



10. Giltin LN, Hauck WW, Dennis MP, Winter L, Hodgson N, Schinfeld S. Long-term effect on mortality of a home intervention that reduces functional difficulties in older adults: Results from a randomized trial. *Journal of the American Geriatrics Society* 2009;57(3):476-81.
11. Gitlin LN, Winter L, Dennis MP, Corcoran M, Schinfeld S, Hauck WW. A randomized trial of a multicomponent home intervention to reduce functional difficulties in older adults. *Journal of the American Geriatrics Society* 2006;54(5):809-16
12. Charlson ME, Pompei P, Ales KL, MacKenzie R. A new method of classifying prognostic comorbidity in longitudinal studies: development and validation. *J Chronic Dis.* 1987;40:373–383.
13. Greenfield S, Apolone G, McNeil B, Cleary P. The importance of coexistent disease in the occurrence of postoperative complications and one year recovery in patients undergoing total hip replacement: comorbidity and outcomes after hip replacement. *Med Care.* 1993;31:141–154.
14. Diederichs C, Berger K, Bartels DB. The Measurement of Multiple Chronic Diseases—A Systematic Review on Existing Multimorbidity Indices. *J Gerontol A Biol Sci Med Sci.* 2011 March;66A(3):301–311
15. Fairall, L., Petersen, I., Zani, B., Folb, N., Georgeu-Pepper, D., Selohilwe, O., Petrus, R., Mntambo, N., Bhana, A., Lombard, C. and Bachmann, M., 2018. Collaborative care for the detection and management of depression among adults receiving antiretroviral therapy in South Africa: study protocol for the CobALT randomised controlled trial. *Trials*, 19(1), p.193.
16. Petersen, I., Bhana, A., Folb, N., Thornicroft, G., Zani, B., Selohilwe, O., Petrus, R., Mntambo, N., Georgeu-Pepper, D., Kathree, T. and Lund, C., 2018. Collaborative care for the detection and management of depression among adults with hypertension in South Africa: study protocol for the PRIME-SA randomised controlled trial. *Trials*, 19(1), p.192.
17. Menezes, P., Quayle, J., Claro, H.G., da Silva, S., Brandt, L.R., Diez-Canseco, F., Miranda, J.J., Price, L.N., Mohr, D.C. and Araya, R., 2019. Use of a Mobile Phone App to Treat Depression Comorbid With Hypertension or Diabetes: A Pilot Study in Brazil and Peru. *JMIR mental health*, 6(4), p.e11698.
18. Gray, W.K., Richardson, J., McGuire, J., Dewhurst, F., Elder, V., Weeks, J., Walker, R.W. and Dotchin, C.L., 2016. Frailty screening in low-and middle-income countries: A systematic review. *Journal of the American Geriatrics Society*, 64(4), pp.806-823.
19. Fried LP, Tangen CM, Walston J et al. Frailty in older adults: Evidence for a phenotype. *J Gerontol A Biol Sci Med Sci* 2001;56A:M146–M156

- 1  
2  
3 20. van Boven JFM, van de Hei SJ, Sadatsafavi M. Making sense of cost-effectiveness  
4 analyses in respiratory medicine: a practical guide for non-health economists. *Eur Respir J*.  
5 2019;53:3  
6  
7  
8  
9 21. Elliot Marseille, Bruce Larson, Dhruv S Kazi, James G Kahnd and Sydney Rosen.  
10 Thresholds for the cost-effectiveness of interventions: alternative approaches. *Bull World*  
11 *Health Organ* 2015;93:118–124  
12  
13  
14 22. Arokiasamy et al. The impact of multimorbidity on adult physical and mental health in low  
15 and middle income countries: what does the study on global ageing and adult health (SAGE)  
16 reveal? *BMC Medicine* (2015) 13:178  
17  
18  
19 23. Lee JT, Hamid F, Pati S, Atun R, Millett C (2015) Impact of Noncommunicable Disease  
20 Multimorbidity on Healthcare Utilisation and Out-Of-Pocket Expenditures in Middle-Income  
21 Countries: Cross Sectional Analysis. *PLoS ONE* 10(7):  
22 e0127199.doi:10.1371/journal.pone.0127199  
23  
24  
25 24. Cookson R, Asaria M, Ali S, Ferguson B, Fleetcroft R, Goddard M, et al. Health Equity  
26 Indicators for the English NHS: a longitudinal whole-population study at the small-area level.  
27 *Health Serv Deliv Res* 2016;4(26).  
28  
29  
30 25. Rijken M, Hujala A, van Ginneken E, Melchiorre MG, Groenewegen P, Schellevis F.  
31 Managing multimorbidity: Profiles of integrated care approaches targeting people with multiple  
32 chronic conditions in Europe. *Health Policy*. 2018 Jan;122(1):44-52.  
33  
34  
35 26. Boerma T, Eozenou P, Evans D, Evans T, Kieny MP, Wagstaff A. Monitoring progress  
36 towards universal health coverage at country and global levels. *PLoS Med*.  
37 2014;11(9):e1001731. Published 2014 Sep 22. doi:10.1371/journal.pmed.1001731  
38  
39  
40 27. GBD 2015 Healthcare Access and Quality Collaborators. Healthcare Access and Quality  
41 Index based on mortality from causes amenable to personal health care in 195 countries and  
42 territories, 1990-2015: a novel analysis from the Global Burden of Disease Study 2015. *Lancet*.  
43 2017 Jul 15;390(10091):231-266  
44  
45  
46 28. Mair FS, May CR. Thinking about the burden of treatment. *BMJ : British Medical Journal*  
47 2014; 349: g6680.  
48  
49  
50 29. Leppin AL, Montori VM, Gionfriddo MR. Minimally Disruptive Medicine: A Pragmatically  
51 Comprehensive Model for Delivering Care to Patients with Multiple Chronic Conditions.  
52 *Healthcare (Basel, Switzerland)* 2015; 3(1): 50-63.  
53  
54  
55  
56  
57  
58  
59  
60

- 1  
2  
3 30. Eton DT, Ridgeway JL, Egginton JS, et al. Finalizing a measurement framework for the  
4 burden of treatment in complex patients with chronic conditions. *Patient related outcome*  
5 *measures* 2015; 6: 117-26.  
6  
7
- 8 31. Eton DT, Yost KJ, Lai J-s, et al. Development and validation of the Patient Experience with  
9 Treatment and Self-management (PETS): a patient-reported measure of treatment burden.  
10 *Quality of Life Research* 2017; 26(2): 489-503.  
11  
12
- 13 32. Tran V-T, Montori VM, Eton DT, Baruch D, Falissard B, Ravaud P. Development and  
14 description of measurement properties of an instrument to assess treatment burden among  
15 patients with multiple chronic conditions. *BMC Medicine* 2012; 10(1): 68.  
16  
17
- 18 33. Déruaz-Luyet A, Goran AA, Tandjung R, et al. Multimorbidity in primary care: protocol of a  
19 national cross-sectional study in Switzerland. *BMJ Open* 2015; 5(10): e009165.  
20  
21
- 22 34. Tran V-T, Messou E, Mama Djima M, Ravaud P, Ekouevi DK. Patients' perspectives on  
23 how to decrease the burden of treatment: a qualitative study of HIV care in sub-Saharan Africa.  
24 *BMJ Quality & Safety* 2019; 28(4): 266.  
25  
26
- 27 35. Duncan P, Murphy M, Man M-S, Chaplin K, Gaunt D, Salisbury C. Development and  
28 validation of the Multimorbidity Treatment Burden Questionnaire (MTBQ). *BMJ Open* 2018; 8(4):  
29 e019413.  
30  
31
- 32 36. Boyd CM, Wolff JL, Giovannetti E, et al. Healthcare task difficulty among older adults with  
33 multimorbidity. *Medical care* 2014; 52 Suppl 3: S118-25.  
34  
35
- 36 37. Gibbons CJ, Kenning C, Coventry PA, et al. Development of a Multimorbidity Illness  
37 Perceptions Scale (MULTIPlES). *PLOS ONE* 2013; 8(12): e81852.  
38  
39
- 40 38. Matima R, Murphy K, Levitt NS, BeLue R, Oni T. A qualitative study on the experiences and  
41 perspectives of public sector patients in Cape Town in managing the workload of demands of  
42 HIV and type 2 diabetes multimorbidity. *PLoS One*. 2018;13(3):e0194191. Published 2018 Mar  
43 14. doi:10.1371/journal.pone.0194191  
44  
45
- 46 39. Naska A, Lagiou A, Lagiou P. Dietary assessment methods in epidemiological research:  
47 current state of the art and future prospects. *F1000Res*. 2017 Jun 16;6:926.  
48  
49
- 50 40. Shim JS, Oh K, Kim HC. Dietary assessment methods in epidemiologic studies. *Epidemiol*  
51 *Health*. 2014 Jul 22;36:e2014009.  
52  
53
- 54 41. de Oliveira Otto MC, Anderson CAM, Dearborn JL, Ferranti EP, Mozaffarian D, Rao G,  
55 Wylie-Rosett J, Lichtenstein AH; American Heart Association Behavioral Change for Improving  
56 Health Factors Committee of the Council on Lifestyle and Cardiometabolic Health and Council  
57 on Epidemiology and Prevention; Council on Cardiovascular and Stroke Nursing; Council on  
58  
59  
60

1  
2  
3 Clinical Cardiology; and Stroke Council. Dietary Diversity: Implications for Obesity Prevention in  
4 Adult Populations: A Science Advisory From the American Heart Association. *Circulation*. 2018  
5 Sep 11;138(11):e160-e168.  
6

7  
8 42. Rathnayake KM, Madushani P, Silva K. Use of dietary diversity score as a proxy indicator  
9 of nutrient adequacy of rural elderly people in Sri Lanka. *BMC Res Notes*. 2012 Aug 29;5:469.  
10

11  
12 43. Walls HL, Johnston D, Mazalale J, Chirwa EW. Why we are still failing to measure the  
13 nutrition transition. *BMJ Glob Health*. 2018 Feb 21;3(1):e000657.  
14

15  
16 44. Barr AL, Young EH, Sandhu MS. Objective measurement of physical activity: improving the  
17 evidence base to address non-communicable diseases in Africa. *BMJ Glob Health*. 2018 Oct  
18 8;3(5):e001044.  
19

20  
21 45. Koyanagi A, Stubbs B, Vancampfort D. Correlates of sedentary behavior in the general  
22 population: A cross-sectional study using nationally representative data from six low- and  
23 middle-income countries. *PLoS One*. 2018 Aug 10;13(8):e0202222.  
24

25  
26 46. Vancampfort D, Stubbs B, Koyanagi A. Physical chronic conditions, multimorbidity and  
27 sedentary behavior amongst middle-aged and older adults in six low- and middle-income  
28 countries. *Int J Behav Nutr Phys Act*. 2017 Oct 27;14(1):147.  
29

30  
31 47. STEPwise approach to surveillance – available at:  
32 <https://www.who.int/ncds/surveillance/steps/en/> last accessed 1<sup>st</sup> August 2019.  
33

34  
35 48. Chow CK, Lock K, Madhavan M, Corsi DJ, Gilmore AB, Subramanian SV, Li W,  
36 Swaminathan S, Lopez-Jaramillo P, Avezum A, Lear SA, Dagenais G, Teo K, McKee M, Yusuf  
37 S. Environmental Profile of a Community's Health (EPOCH): an instrument to measure  
38 environmental determinants of cardiovascular health in five countries. *PLoS One*. 2010 Dec  
39 10;5(12):e14294.  
40

41  
42 49. Corsi DJ, Subramanian SV, McKee M, Li W, Swaminathan S, Lopez-Jaramillo P, Avezum  
43 A, Lear SA, Dagenais G, Rangarajan S, Teo K, Yusuf S, Chow CK. Environmental Profile of a  
44 Community's Health (EPOCH): an ecometric assessment of measures of the community  
45 environment based on individual perception. *PLoS One*. 2012;7(9):e44410  
46

47  
48 50. Kim S, Adamson KC, Balfanz DR, Brownson RC, Wiecha JL, Shepard D, Alles WF.  
49 Development of the Community Healthy Living Index: a tool to foster healthy environments for  
50 the prevention of obesity and chronic disease. *Prev Med*. 2010 Jan;50 Suppl 1:S80-5.  
51

52  
53 51. Hur MH. Demographic and Socioeconomic Determinants of Self-Efficacy: An Empirical  
54 Study of Korean Older Adults. *Int J Aging Hum Dev*. 2018;87(3):289-308.  
55  
56  
57  
58  
59  
60

- 1  
2  
3 52. Callander EJ, Schofield DJ. Impact of multidimensional poverty on the self-efficacy of older  
4 people: Results from an Australian longitudinal study. *Geriatr Gerontol Int*. 2017;17(2):308-14.  
5  
6  
7 53. Kollia N, Caballero FF, Sanchez-Niubo A, Tyrovolas S, Ayuso-Mateos JL, Haro JM, et al.  
8 Social determinants, health status and 10-year mortality among 10,906 older adults from the  
9 English longitudinal study of ageing: the ATHLOS project. *BMC Public Health*. 2018;18(1):1357.  
10  
11 54. Qian H, Yuan C. Factors associated with self-care self-efficacy among gastric and  
12 colorectal cancer patients. *Cancer Nurs*. 2012;35(3):E22-31.  
13  
14  
15 55. Schnell-Hoehn KN, Naimark BJ, Tate RB. Determinants of self-care behaviors in  
16 community-dwelling patients with heart failure. *J Cardiovasc Nurs*. 2009;24(1):40-7.  
17  
18  
19 56. Baheiraei A, Bakouei F, Mohammadi E, Montazeri A, Hosseni M. The Social Determinants  
20 of Health in Association with Women's Health Status of Reproductive Age: A Population-Based  
21 Study. *Iran J Public Health*. 2015;44(1):119-29.  
22  
23  
24 57. Walker RJ, Gebregziabher M, Martin-Harris B, Egede LE. Independent effects of  
25 socioeconomic and psychological social determinants of health on self-care and outcomes in  
26 Type 2 diabetes. *Gen Hosp Psychiatry*. 2014;36(6):662-8.  
27  
28  
29 58. Caprara GV, Vecchione M, Alessandri G, Gerbino M, Barbaranelli C. The contribution of  
30 personality traits and self-efficacy beliefs to academic achievement: a longitudinal study. *Br J*  
31 *Educ Psychol*. 2011;81(Pt 1):78-96  
32  
33  
34 59. Di Giunta L, Eisenberg N, Kupfer A, Steca P, Tramontano C, Caprara GV. Assessing  
35 Perceived Empathic and Social Self-Efficacy Across Countries. *Eur J Psychol Assess*.  
36 2010;26(2):77-86.  
37  
38  
39 60. van der Slot WM, Nieuwenhuijsen C, van den Berg-Emons RJ, Wensink-Boonstra AE,  
40 Stam HJ, Roebroek ME. Participation and health-related quality of life in adults with spastic  
41 bilateral cerebral palsy and the role of self-efficacy. *J Rehabil Med*. 2010;42(6):528-35.  
42  
43  
44 61. Liebke L, Bungert M, Thome J, Hauschild S, Gescher DM, Schmahl C, et al. Loneliness,  
45 social networks, and social functioning in borderline personality disorder. *Personal Disord*.  
46 2017;8(4):349-56.  
47  
48

## Contributorship

The concept of the paper arose from discussion at the GACD Multi-Morbidity Working Group. Individual sections of the manuscript were drafted by the named authors, coordinated by JRH, with all contributors providing important intellectual content and approving this final version for submission.

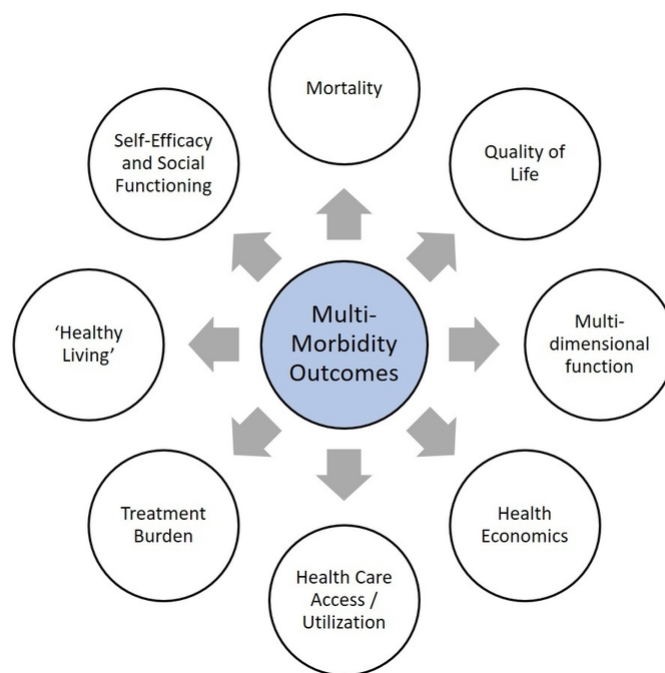

FIGURE 1: Eight domains of outcome measures for multi-morbidity interventions in LMIC.

84x56mm (300 x 300 DPI)

# BMJ Open

## A Critical Review of Multi-Morbidity Outcome Measures suitable for Low- and Middle Income Country Settings: perspectives from the Global Alliance for Chronic Diseases (GACD) Researchers

|                                 |                                                                                                                                                                                                                                                                                                                                                                                                                                                                                                                                                                                                                                                                                                                                                                                                                                                                                                                                                                                                                                                                                                          |
|---------------------------------|----------------------------------------------------------------------------------------------------------------------------------------------------------------------------------------------------------------------------------------------------------------------------------------------------------------------------------------------------------------------------------------------------------------------------------------------------------------------------------------------------------------------------------------------------------------------------------------------------------------------------------------------------------------------------------------------------------------------------------------------------------------------------------------------------------------------------------------------------------------------------------------------------------------------------------------------------------------------------------------------------------------------------------------------------------------------------------------------------------|
| Journal:                        | <i>BMJ Open</i>                                                                                                                                                                                                                                                                                                                                                                                                                                                                                                                                                                                                                                                                                                                                                                                                                                                                                                                                                                                                                                                                                          |
| Manuscript ID                   | bmjopen-2020-037079.R1                                                                                                                                                                                                                                                                                                                                                                                                                                                                                                                                                                                                                                                                                                                                                                                                                                                                                                                                                                                                                                                                                   |
| Article Type:                   | Original research                                                                                                                                                                                                                                                                                                                                                                                                                                                                                                                                                                                                                                                                                                                                                                                                                                                                                                                                                                                                                                                                                        |
| Date Submitted by the Author:   | 28-Apr-2020                                                                                                                                                                                                                                                                                                                                                                                                                                                                                                                                                                                                                                                                                                                                                                                                                                                                                                                                                                                                                                                                                              |
| Complete List of Authors:       | Hurst, John; UCL Medical School,, Academic Unit of Respiratory Medicine<br>Agarwal, Gina; McMaster University, Family Medicine<br>van Boven, Job F. M.; Univ Groningen<br>Daivadanam, Meena; Karolinska Institutet, Department of Public Health Sciences; Uppsala University , Department of Food, Nutrition and Dietetics<br>Gould, Gillian; The University of Newcastle, School of Medicine and Public Health; University of Newcastle Hunter Medical Research Institute,<br>Wan-Chun Huang, Erick ; Woolcock Institute of Medical Research, Sydney, Australia<br>Maulik, Pallab; The George Institute for Global Health,<br>Miranda, J. Jaime; Universidad Peruana Cayetano Heredia, CRONICAS Centre of Excellence in Chronic Diseases<br>Owolabi, M. O.; University of Ibadan College of Medicine, Medicine<br>Premji, Shahirose ; York University,<br>Soriano, Joan; Universidad Autónoma de Madrid,<br>Vedanthan, Rajesh; NYU Langone Health,<br>Yan, Lijing; Global Health Research Center, Duke Kunshan University, Kunshan, Jiangsu, China<br>Levitt, Naomi; University of Cape Town , medicine |
| <b>Primary Subject Heading</b>: | Global health                                                                                                                                                                                                                                                                                                                                                                                                                                                                                                                                                                                                                                                                                                                                                                                                                                                                                                                                                                                                                                                                                            |
| Secondary Subject Heading:      | Cardiovascular medicine, Diabetes and endocrinology, Evidence based practice, General practice / Family practice, Global health                                                                                                                                                                                                                                                                                                                                                                                                                                                                                                                                                                                                                                                                                                                                                                                                                                                                                                                                                                          |
| Keywords:                       | PRIMARY CARE, PUBLIC HEALTH, STATISTICS & RESEARCH METHODS, Clinical trials < THERAPEUTICS                                                                                                                                                                                                                                                                                                                                                                                                                                                                                                                                                                                                                                                                                                                                                                                                                                                                                                                                                                                                               |
|                                 |                                                                                                                                                                                                                                                                                                                                                                                                                                                                                                                                                                                                                                                                                                                                                                                                                                                                                                                                                                                                                                                                                                          |

SCHOLARONE™  
Manuscripts



I, the Submitting Author has the right to grant and does grant on behalf of all authors of the Work (as defined in the below author licence), an exclusive licence and/or a non-exclusive licence for contributions from authors who are: i) UK Crown employees; ii) where BMJ has agreed a CC-BY licence shall apply, and/or iii) in accordance with the terms applicable for US Federal Government officers or employees acting as part of their official duties; on a worldwide, perpetual, irrevocable, royalty-free basis to BMJ Publishing Group Ltd ("BMJ") its licensees and where the relevant Journal is co-owned by BMJ to the co-owners of the Journal, to publish the Work in this journal and any other BMJ products and to exploit all rights, as set out in our [licence](#).

The Submitting Author accepts and understands that any supply made under these terms is made by BMJ to the Submitting Author unless you are acting as an employee on behalf of your employer or a postgraduate student of an affiliated institution which is paying any applicable article publishing charge ("APC") for Open Access articles. Where the Submitting Author wishes to make the Work available on an Open Access basis (and intends to pay the relevant APC), the terms of reuse of such Open Access shall be governed by a Creative Commons licence – details of these licences and which [Creative Commons](#) licence will apply to this Work are set out in our licence referred to above.

Other than as permitted in any relevant BMJ Author's Self Archiving Policies, I confirm this Work has not been accepted for publication elsewhere, is not being considered for publication elsewhere and does not duplicate material already published. I confirm all authors consent to publication of this Work and authorise the granting of this licence.



# A Critical Review of Multi-Morbidity Outcome Measures suitable for Low- and Middle Income Country Settings: perspectives from the Global Alliance for Chronic Diseases (GACD) Researchers

John R Hurst, Gina Agarwal, Job F M van Boven, Meena Daivadanam, Gillian S Gould, Erick Wan-Chun Huang, Pallab K Maulik, J Jaime Miranda, Mayowa O Owolabi, Shahirose Sadrudin Premji, Joan B Soriano, Rajesh Vedanthan, Lijing L Yan, Naomi S Levitt\*

**\*: on behalf of the GACD Multi-Morbidity Working Group contributors:**

Ricardo Araya, Kirsten Bobrow, Niels H Chavannes, F Xavier Gómez-Olivé, Shabbar Jaffar, Bruce J Kirenga, Rianne M J J van der Kleij, Muralidhar M Kulkarni, Laura Loli-Dano, Patricio Lopez-Jaramillo, Shane Norris, Josefien van Olmen, Gary Parker, Trishul Siddharthan, Kamran Siddiqi, Najma Siddiqi, Antigona C Trofor

**Corresponding Author:**

John R Hurst  
Professor of Respiratory Medicine  
UCL Respiratory  
University College London  
London  
UK

[j.hurst@ucl.ac.uk](mailto:j.hurst@ucl.ac.uk)

## Funding

The article was supported by the Global Alliance for Chronic Diseases (GACD) secretariat. The Authors are investigators on individual studies funded in collaboration with the GACD.

## Conflict of Interest

The Authors have no conflicts of interest to declare in relation to this work.

**KEYWORDS:** Multimorbidity; Outcome Assessment, Health Care;

**WORDCOUNT:** 4672

## Abstract

*OBJECTIVES: There is growing recognition around the importance of multi-morbidity in low- and middle-income country (LMIC) settings, and specifically the need for pragmatic intervention studies to reduce the risk of developing multi-morbidity, and of mitigating the complications and progression of multi-morbidity in LMICs. One of many challenges in completing such research has been the selection of appropriate outcomes measures. A 2018 Delphi exercise to develop a core-outcome set for multi-morbidity research (COSmm) did not specifically address the challenges of multi-morbidity in LMICs where the global burden is greatest, patterns of disease often differ and health systems are frequently fragmented. We therefore aimed to summarise and critically review outcome measures suitable for studies investigating mitigation of multi-morbidity in low- and middle-income country (LMIC) settings.*

*SETTING: LMIC.*

*PARTICIPANTS: people with multi-morbidity.*

*OUTCOME MEASURES: identification of all outcome measures.*

*RESULTS: We present a critical review of outcome measures across eight domains: mortality, quality of life, function, health economics, health-care access and utilization, treatment burden, measures of 'healthy living', and self-efficacy and social functioning.*

*CONCLUSIONS: Studies in multi-morbidity are necessarily diverse and thus different outcome measures will be appropriate for different study designs. Presenting the diversity of outcome measures across domains should provide a useful summary for researchers, encourage the use of multiple domains in multi-morbidity research, and provoke debate and progress in the field.*

*TRIAL REGISTRATION: Not applicable.*

## Strengths and Limitations

- There is no existing review of outcome measures suitable for use in studies to mitigate multi-morbidity in LMIC settings.
- The article is the written by the Global Alliance for Chronic Diseases researchers.
- It is not a systematic review.
- Further work is required to develop a core-outcome set for use in LMIC.

## Introduction

There is growing recognition around the importance of multi-morbidity in low- and middle-income countries (LMICs) [1]. Multi-morbidity, as defined by the United Kingdom Academy of Medical Sciences (AMS) refers to “*the co-existence of two or more chronic conditions, each of which is either a physical non-communicable disease of long duration, a mental health condition of long duration, or an infectious disease of long duration*” [1]. The AMS report highlights challenges in delivering multi-morbidity research [2], including the selection of appropriate outcome measures. In 2018, Smith completed a Delphi exercise to develop a core-outcomes set for multi-morbidity research (COSmm) [3]. The highest scoring outcomes were health-related quality of life, mental health outcomes and mortality. Whilst ground-breaking, this process did not specifically target the challenges of multi-morbidity in LMICs where the global burden is greatest, patterns of disease often differ and health systems are frequently fragmented.

The Global Alliance for Chronic Diseases (GACD) is an alliance of health-research funders, whose research teams form a network of multidisciplinary researchers from both LMICs and high-income countries (HICs). We aim to reduce the impact of non-communicable diseases (NCDs) through a focus on implementation science research in LMICs, and high-priority populations in HICs. Recognizing synergies across our disease-specific programmes, in 2017 we formed a Multi-Morbidity Working Group and published a GACD Researchers’ Statement concluding that “*a greater focus on multi-morbidity is overdue and necessary to successfully improve global health outcomes*”, thus acknowledging the specific challenge of multi-morbidity in the LMIC context [4]. The statement went on to propose three strategic objectives, one of which was to change the way research is commissioned, funded and delivered when considering NCDs in LMICs.

Discussion with research funders subsequently highlighted that one barrier to funding research addressing multi-morbidity in LMICs was a perceived lack of robust outcome measures. We have therefore developed this GACD Researchers’ perspective on outcome measures suitable for studies of multi-morbidity in LMICs, taking into account the challenges of (routine) data collection, and patient-provider factors such as differences in interpreting social constructs and health literacy. The intent is to build on the COSmm work [3]. Derived from a common base of expertise in NCD implementation research in LMICs, we present a diversity of potential measures that can accommodate different aspects of impact in LMICs, ranging from individual level outcomes to health service and health system effects. This is not an attempt to provide a core outcome measures set. Rather, together, the potential outcome measures inform different evaluations of effectiveness and/or process for multi-morbidity. We present these as a useful resource for those designing and reviewing intervention studies for multi-morbidity in LMIC settings, and hope this initiative may promote harmonization across studies that will be essential to better map the impact of multi-morbidity in LMIC settings.

## Method

Potential outcome measures suitable for studies of multi-morbidity in LMICs were collected through a survey among the GACD multi-morbidity working group, and distilled by the writing committee (the Authors) into categories through consensus discussion. All GACD researchers were invited to take part in the multi-morbidity working group and those expressing interest were then invited to provide suggestions for suitable outcome measures via free-text e-mail to the group leads. In total, 31 group members participated (listed as the Authors and Contributors), with representation from all WHO Regions except the Eastern Mediterranean. GACD researchers have considerable collective experience conducting implementation science trials in LMIC settings. All measures had to be suitable for use in multi-morbidity intervention studies in LMIC, either at the individual or the population level, and from an implementation science perspective. Criteria for suitability included ease of measurement (such as availability of data, ease of data collection, availability of local translations and cost), generalizability (applicability of the proposed outcome across diverse populations within and between LMIC settings) and statistical considerations (the feasibility of demonstrating a clinically significant change with conventional statistical significance). Each outcome approach is fully described below. The initial synthesis was reviewed by members of the GACD Multi-Morbidity Working Group for additional comments and suggestions (the Contributors). The resulting narrative review summarizes the group's collective thoughts within each domain of outcome measures studied.

### Patient and Public Involvement

Patients or the public were not involved in the design, conduct, reporting, or dissemination plans of our research.

## Outcome Measures for Multi-Morbidity Interventions in LMIC

### 1. Mortality

Death is the final common outcome for all individuals. Thus (premature) mortality is the most broadly applicable, generalizable, and comparable outcome for multi-morbidity research. Indeed, mortality was considered as an "essential" core outcome measure for multi-morbidity research according to the COSmm consensus [3].

However, precisely because mortality is so broadly applicable, it suffers from a lack of specificity. While cause-specific mortality is a potential solution to the issue of specificity, this approach moves away from the goal of multi-morbidity-based outcome consideration. In addition, mortality does not reflect the quality of life that an individual experiences during the time of survival; particularly in the context of multi-morbidity, both disability and quality-of-life considerations are important in terms of an individual's experience of illness, wellness and life. Indeed, death is not always the most important outcome from a patient-centered perspective, as has been demonstrated in studies assessing patient preferences of different potential health outcomes [5-7] and conceptualized as Disability-Adjusted Life Years.

Practical challenges with mortality as an outcome measure include statistical power and sample size for an outcome that is relatively rare compared to other outcomes and proxies, potentially

1  
2  
3 requiring much longer follow-up periods, except for older and/or more severely affected  
4 populations. It is, however, generally easy to measure and while the primary cause may be  
5 ascertained through techniques such as verbal autopsy (2016 WHO VA standard) [8], assessing  
6 the contribution of multi-morbidity at verbal autopsy is more challenging. Whilst misclassifying  
7 the cause of death can impact the effect size for cause-specific mortality, power will be  
8 preserved for all-cause mortality. In some LMICs, ascertainment of deaths remains difficult due  
9 to the lack of mature vital registry systems and cultural traditions promoting deaths at home with  
10 delay in reporting.  
11  
12

13  
14 Thus, mortality as an outcome for multi-morbidity research has been infrequently utilized,  
15 particularly in the context of LMIC settings [9-11]. Demographic surveillance sites that have a  
16 long record of verbal autopsy could, however, provide a useful data reservoir to examine  
17 associations between multi-morbidity and mortality.  
18  
19  
20

## 21 **2. Generic Quality of Life scales**

22 Health-related quality of life (HRQoL) instruments measure multidimensional wellbeing and  
23 functioning. Such scales may be generic such as EQ-5D and SF-36, or disease (/area) specific.  
24 While disease-specific measures may have better content and face validity as well as better  
25 responsiveness and sensitivity to change compared to generic measures, generic measures are  
26 (by definition) not disease specific and likely better for comparison of HRQoL among different  
27 diseases and for diseases in combination, an important consideration for multi-morbidity  
28 research. Tools to assess the related construct of self-reported well-being have been reviewed  
29 and summarized elsewhere [12].  
30  
31  
32

33 Among generic tools, the COSmm consensus [3] ranked the EQ-5D, SF36 and '12, and Global  
34 quality of life (WHOQOL-BREF) most highly.  
35  
36

37 The EQ-5D [13] has been widely used since introduction in the 1990s, facilitating health-  
38 economic analysis (see below). It is designed to be completed by the participant and is  
39 available in multiple languages and thus widely applicable. The EQ-5D questionnaire has two  
40 components (health-state description and evaluation). In the health state description, health  
41 status is measured across five dimensions: mobility, self-care, usual activities, pain/discomfort,  
42 and anxiety/depression. In the evaluation section, the respondents evaluate their overall health  
43 status using a visual analogue scale.  
44  
45  
46

47 The SF-36 [14] has 36 questions across eight domains: vitality, physical functioning, bodily pain,  
48 general health perceptions, physical role functioning, emotional role functioning, social role  
49 functioning and mental health.  
50

51 The WHOQOL-BREF [15] is an abbreviated version of the WHOQOL-100 quality of life  
52 assessment, originally developed by the WHOQOL Group working across fifteen international  
53 field centers to develop a quality of life assessment applicable across multiple settings.  
54  
55  
56  
57  
58  
59  
60

1  
2  
3 HRQoL tools have a number of advantages over mortality as an outcome, being amenable to  
4 changes in the short term. HRQoL outcomes are particularly meaningful as the aim of clinical  
5 treatment and management is generally optimizing quality of life. Consequently, managing  
6 multi-morbidity needs to take quality of life into account both as an outcome marker, but also an  
7 input factor into formulating clinical management. Practical considerations in LMIC include the  
8 availability of valid translations in local languages (these are more often available for the more  
9 commonly used tools, in the more commonly used languages, but coverage remains  
10 incomplete), and the challenges of use in populations with low literacy or understanding of  
11 visual-analogue scales. Other unanswered questions include whether thresholds for minimum  
12 clinically important differences on these scales should be altered in the context of multi-  
13 morbidity. Notably, some common NCDs such as hypertension are not generally associated  
14 with significant symptom burden.  
15  
16  
17  
18  
19

### 20 **3. Multi-dimensional indices of function**

21 The AMS [1] recommended that reports of multi-morbidity should provide details of functional  
22 deficits, or disabilities and frailty. In both instances the recommendation was made that this  
23 should be coded using a standardized classification scheme. For the former, the WHO  
24 Disability Assessment Schedule 2.0 (WHODAS 2.0) or the International Classification of  
25 Functioning, Disability and Health (ICF) were suggested. For the latter, the cumulative deficit  
26 model of frailty or Fried's phenotype model was recommended (see below).  
27  
28  
29

#### 30 **WHO Disability Assessment Schedule**

31 The WHODAS 2.0 has been widely used in epidemiological and observational studies in LMICs.  
32 It is a self-administered 12 item questionnaire that assesses six different adult life tasks over the  
33 preceding month. The specific areas covered are 1) understanding and communication; 2) self-  
34 care; 3) mobility; 4) interpersonal relationships; 5) work and household roles and 6) community  
35 and civic roles. WHODAS has been included as a secondary outcome measure in three multi-  
36 morbidity trials in LMIC (currently unreported [16, 17]).  
37  
38  
39

#### 40 **Frailty assessment instruments:**

41 There are many methods to assess frailty including the Fried Index, the Frailty Index and the  
42 British Frailty Index. While these have been used to examine the prevalence, correlates or  
43 outcomes of frailty in LMIC, further validation is still required in these settings [18]. Of the  
44 various metrics, the Fried Index [19] has been the most commonly used in LMIC. This index  
45 measures frailty by the presence of three or more of five physical deficits - exhaustion,  
46 weakness, slowness, low levels of activity and weight loss. Three of the items are collected  
47 using questionnaires, but slowness is assessed using a walking test and weakness by  
48 assessing grip strength. The Frailty Index has also been commonly used in LMICs and uses  
49 the presence or absence of medical conditions or poor performance on functional tasks to  
50 assess the number of deficits present and thus frailty [18]. Using frailty as an outcome measure  
51 for intervention studies in patients with multi-morbidity in LMIC may be limited by factors such as  
52 a lack of equipment (for example, to measure grip strength), and the question remains as to  
53 how susceptible to change such measurements are, and what a minimum clinically important  
54  
55  
56  
57  
58  
59  
60

1  
2  
3 difference (MCID) might be. Despite this, frailty instruments remain an important outcome in  
4 LMIC settings given that frailty may be a confounding factor in self-care, treatment adherence  
5 and family burden.  
6  
7

### 8 **Assessment of physical functioning:**

9 Physical functioning measures are commonly studied outcomes. The most frequently used  
10 indices include activities of daily living (such as eating, dressing and toileting), instrumental  
11 activities of daily living (such as shopping and answering phone calls), and the Barthel Index  
12 (self-reported outcomes on degree of assistance needed for mobility, self-care and continence).  
13 Smith [3] described activities of daily living, physical function and physical activity as core  
14 outcomes in multi-morbidity interventions. For ADL the following measures received greatest  
15 support: Frenchay Activities Index (FAI), Nottingham Extended Activities of Daily Living  
16 (NEADL) and the Instructions for Activities of Daily Living questionnaire (ADL/ IADL), but these  
17 have not been evaluated in the context of LMICs.  
18  
19  
20

21 The modified Rankin Scale is an example of a disease-specific (in this case, stroke) composite  
22 outcome measure including rating of functioning from no interference with daily life, through  
23 various degrees of disability to death. These outcomes are relatively easy to assess and have  
24 particular relevance in LMICs as people generally express strong desires in maintaining  
25 physical functioning including their ability to work, avoiding financial consequences and burden  
26 on family caregiving.  
27  
28  
29  
30

### 31 **4. Health Economic implications**

32 The AMS report [1] highlighted the economic burden of multi-morbidity in LMICs and thus health  
33 economic implications are relevant in any consideration of multi-morbidity outcome measures.  
34 However, most economic data on multi-morbidity were gathered in HICs and the question arises  
35 as to whether measurement instruments, data and outcomes commonly used to assess cost  
36 implications of multi-morbidity in HICs are applicable to LMIC settings.  
37  
38

39 One of the most common economic evaluations of healthcare interventions makes use of a  
40 technique called cost-effectiveness analysis and specifically the *incremental cost-effectiveness*  
41 *ratio* (ICER) [20]. The method to calculate the ICER is not disease specific, making it just as  
42 suitable to assess multi-morbidity interventions as single disease interventions. However, it  
43 requires specific attention to the definitions and collection of costs and effect data in LMICs.  
44 Within this ratio, costs and effects can be defined, measured, and calculated in different ways,  
45 of which some are more suitable in economic assessment of multi-morbidity interventions in  
46 LMICs than others. Interpretation of the ratio may differ in different settings.  
47  
48  
49

50 In healthcare, interventions can impact different types of direct and indirect costs within and  
51 outside healthcare systems. The different costs to be included in cost-effectiveness analysis  
52 depends on the perspective that is taken (e.g. the healthcare payer, the society, the patient, or  
53 the family). Costs that directly result from the intervention and which occur within healthcare  
54 systems should be included when a healthcare payer perspective is taken. However, in LMICs  
55  
56  
57  
58  
59  
60

1  
2  
3 that lack universal health coverage, the perspective of the patient and family may be more  
4 relevant and a key focus could be on out-of-pocket costs. Examples of indirect costs are work  
5 productivity losses and these costs are especially relevant when a patient or societal  
6 perspective is taken.  
7

8  
9 In health economic studies, the effect of intervention uses a measure that is independent of a  
10 specific disease: the quality-adjusted life year (QALY). The QALY is a combination of utility  
11 (preferably measured using the EQ-5D) and survival. With the EQ-5D, certain health states are  
12 defined, to which a specific utility is assigned. Utility is the value a society gives to a specified  
13 health state and for each country a specific algorithm should be estimated from large general  
14 population samples. In many LMIC settings these still need to be further developed to allow for  
15 generalizable models of effectiveness.  
16  
17

18  
19 While most HICs have defined guidelines and make use of fixed thresholds or ranges to assess  
20 whether a certain ICER is considered cost-effective, such guidelines and thresholds are  
21 generally lacking in LMICs. This complicates the interpretation of cost-effectiveness analyses in  
22 LMICs. As a general rule, the World Health Organization (WHO) defines an intervention that  
23 costs less than three times the gross domestic product per capita as cost-effective [21]. It is  
24 important to note that the implications of economic analyses discussed here are not challenges  
25 specific to multi-morbidity, but are nonetheless suitable for the study of multi-morbidity.  
26  
27  
28  
29

### 30 **5. Health Care Access and Utilization**

31 Multi-morbidity is associated with repeated care seeking, often at different providers. This not  
32 only results in multiple interactions with health care settings through outpatient and inpatient  
33 admissions but also involves para-medical services and practitioners of traditional medicine.  
34  
35

36 Although we identified no study that has specifically looked at generating or testing multi-  
37 morbidity related healthcare access indices in LMICs, the WHO Study on Global Ageing and  
38 Adult Health (SAGE) which focused on LMICs tracked indicators specific to multi-morbidity in  
39 ageing populations [22, 23]. These included the number of outpatient visits in the last 12  
40 months, overnight hospital stays in the past three years, and the number of overnight stays in  
41 hospital in the past 12 months. A UK National Health Service document [24] outlines equity  
42 indicators that may also map multi-morbidity relevant in LMIC settings, and some of these have  
43 direct healthcare access relevance such as emergency hospitalizations for chronic conditions  
44 and repeat emergency hospitalizations in the same year. Access to medicines listed on the  
45 WHO Essential Medications list would provide another metric, as would recommendations on  
46 attention to comorbidity and pharmacological interactions in treatment guidelines.  
47  
48  
49

50 This lack of LMIC specific multi-morbidity indices to plot healthcare access leads to a critically  
51 important avenue of research that could draw on that conducted in HICs [25]. The latter work  
52 lists a range of objectives that need to be addressed in healthcare practices catering to clients  
53 with multi-morbidity and lists a set of preventive services for such cases which health facilities  
54 should provide. Health-seeking behaviour is a further dimension related to healthcare access  
55  
56  
57  
58  
59  
60



1  
2  
3 that is shaped by unique socioeconomic and cultural contexts faced by patients in LMICs. We  
4 suggest it would be useful to develop health-seeking behaviour indices relevant across LMICs.  
5 This needs a contextual framework to best understand what is feasible and what can be tracked  
6 within specific LMIC settings, acknowledging the challenges introduced by the fragmentation of  
7 care and the multiplicity of levels of provision of care in the public and private sectors. Such  
8 indices could be linked with existing monitoring frameworks used to assess Universal Health  
9 Coverage [26].  
10  
11

12  
13 The Global Burden of Disease initiative has recently incorporated a new metric at national level  
14 termed the Healthcare Access and Quality (HAQ) Index [27]. The HAQ index is a scale from 0  
15 to 100, calculated by measuring mortality rates from causes that should not be fatal (amenable  
16 mortality) in the presence of effective medical care. This correlates with the Socio-demographic  
17 Index, a measure of overall development consisting of income *per capita*, average years of  
18 education, and total fertility rates.  
19  
20  
21  
22

## 23 **6. Treatment burden**

24 The burden of treatment, a relatively new concept, emerged from disease-centered healthcare  
25 systems in response to the growing needs of coping with chronic conditions. In the context of  
26 multi-morbidity, this may be considered as the workload and impact on a patient as a result of  
27 receiving medical care [28]. High treatment burden may lead to overwhelmed patients who  
28 struggle to access healthcare and adhere to suggested treatment whilst coordinating their own  
29 care and other aspects of life, a particular issue among patients with multi-morbidity. As a  
30 consequence, polypharmacy and non-adherence to treatment and poor clinical outcomes may  
31 follow, resulting in an even higher burden of treatment, a deterioration cycle depicted in the  
32 Cumulative Complexity Model [29]. Therefore, assessing treatment burden is a priority in order  
33 to achieve better quality healthcare, and treatment burden is a potential outcome measure in  
34 interventions directed against multi-morbidity. There is also the challenge, more pronounced in  
35 LMICs, that in areas of no care there can be no 'burden' from treatment which it is impossible to  
36 access.  
37  
38  
39  
40

41 Assessing the burden of treatment is not an easy task. It generally requires multi-dimensional  
42 measures that are tailored to the medical condition(s), health system(s) and cultural  
43 background. Tailoring to specific conditions may diminish value in multi-morbidity. Eton  
44 proposed a conceptual framework of treatment burden based on qualitative inquiries to patients  
45 with chronic conditions, consisting of three themes and 15 subthemes [30]. A number of tools  
46 for evaluating treatment burden for patients with multi-morbidity have been developed in the  
47 past few years. Eton designed and validated the Patient Experience with Treatment and Self-  
48 management (PETS) [31]. The Treatment Burden Questionnaire (TBQ) is another instrument,  
49 consisting of 15 items [32] and later further adapted [33, 34]. In 2018, Duncan published the  
50 Multimorbidity Treatment Burden Questionnaire (MTBQ), a ten-item measure initially validated  
51 in primary care in the United Kingdom [35]. The Healthcare Task Difficulty (HCTD)  
52 questionnaire is an 11-question tool designed to measure only one aspect – perceived difficulty  
53 in performing healthcare management tasks [36]. Finally, the Multi-morbidity Illness  
54  
55  
56  
57  
58  
59  
60

1  
2  
3 Perceptions Scale (MULTIPLES), unlike other instruments, was designed to measure the  
4 perceived impact of multi-morbidity [37]. The scale includes treatment burden (six questions) as  
5 one of the subscales.  
6  
7

8 As these questionnaires are relatively new, validation and translation for different populations  
9 and geographic areas remain limited, especially in LMICs. Exploring the notion and  
10 measurement of treatment burden in LMIC remains relatively unexplored [34, 38], as does the  
11 important concept of patient-reported experience measures in LMIC settings which may  
12 themselves affect health outcomes [39].  
13  
14

15 There are a number of remaining issues to be considered before applying these tools in LMICs.  
16 Firstly, the strengths and limitations of each tool should be examined as careful validation has  
17 often not been conducted in such settings. Secondly, using mixed methods incorporating  
18 experiences and opinions from patients and healthcare providers may help identify relevant  
19 issues relating to differences in contexts, cultures and health system structures. Thirdly, as all of  
20 these instruments have been available for less than a decade, longitudinal evidence of change  
21 over time is absent.  
22  
23  
24  
25

## 26 **7. Measures of 'Healthy Living'**

27 Multi-morbidity is complex to operationalize, which makes common denominators very relevant.  
28 Measures of 'Healthy Living' are direct common denominators for being at risk of developing  
29 individual components of multi-morbidity, and thus measuring change in these measures  
30 provides potential generic outcomes of interventions to mitigate future multi-morbidity. Most  
31 current behavioral interventions have targeted only one behaviour at a time.  
32  
33

34 Healthy living encompasses many different aspects of health and wellbeing, including diet,  
35 physical activity including sedentary behaviour, tobacco and alcohol consumption, developing  
36 health literacy, maintaining good hygiene, and sanitation. Most current behavioral interventions  
37 have targeted only one behaviour at a time.  
38  
39

40  
41 *Diet:* Dietary assessments are complex. Self-reported dietary intake measurements are the  
42 most common form of dietary assessments, which include prospective recording of actual food  
43 consumed or retrospective recall [40, 41]. With respect to multi-morbidity, the focus must be on  
44 long-term usual intake. Dietary diversity scores are one such measure that can be estimated for  
45 the individual, or the household using counts of food items (food variety score) or food groups  
46 (dietary diversity score) consumed over a pre-specified period [42, 43]. Dietary diversity can be  
47 estimated at the Household level using the Household Dietary Diversity Score (HDDS), which  
48 assesses household access to a variety of foods, or at individual level for women and children  
49 respectively using the Minimum Dietary Diversity for Women of Reproductive Age tool (MDD-W)  
50 and WHO Infant and Young Child Minimum Dietary Diversity Tool (IYCF-MDD) [44].  
51  
52  
53

54 *Physical activity (PA) including sedentary behaviour:* Convincing interventional evidence  
55 showing a clear dose-response relationship between PA and improved health outcomes comes  
56  
57  
58

1  
2  
3 mainly from HICs, although associations of PA with reduced cardiovascular mortality and  
4 morbidity are available globally [45]. Sedentary behaviour, defined as those that involve sitting  
5 or reclining and low levels of energy expenditure during waking hours [46], has also been  
6 associated with having at least two morbidities, independent of light, moderate or vigorous PA  
7 [46, 47] in HICs and LMICs. The Global Physical Activity Questionnaire (GPAQ) that is part of  
8 the WHO STEPwise Approach to Chronic Disease Risk Factor Surveillance data collection tool  
9 [48] is a commonly used tool to collect self-reported data on PA. The GPAQ which is a shorter  
10 (16-item) version of the longer International Physical Activity Questionnaire (IPAQ) also  
11 assesses sitting time in addition to PA in three domains (work, travel and leisure-time). This is  
12 used to estimate the duration of moderate to vigorous physical activity (MVPA) or intensity in  
13 terms of MET (metabolic equivalent)-minutes per week of total and domain-specific activities.  
14 However, agreement between PA estimated by GPAQ and more objective measures has been  
15 moderate at best. Objective measures of PA allow real-time monitoring and can be easily  
16 completed using an application on a mobile device or a wearable pedometer or accelerometer,  
17 although this has mostly been tested in HIC settings. Considering the rapid acceleration of  
18 smart phone ownership in LMIC, and the availability of cheaper but robust wearable devices,  
19 these are now viable options and an optional tool to capture objective PA has since been  
20 incorporated into the GPAQ.  
21  
22  
23  
24  
25

26 *Tobacco and alcohol use:* Tobacco use has been consistently linked as a causative factor for  
27 chronic respiratory disorders such as chronic obstructive pulmonary disease, cardiovascular  
28 disease and many cancers including lung cancer. Similarly, alcohol use has strong associations  
29 with NCDs. Ever and current use of tobacco or current use of alcohol are commonly used  
30 assessments in addition to questions focusing on frequency and amount of consumption, and  
31 these are part of the WHO STEPS instrument [48]. Where available, verification of smoking  
32 status can be achieved through measurement of carbon monoxide or urinary cotinine.  
33 Assessment of household, environmental and occupational airborne exposures are more  
34 complex.  
35  
36  
37

38 *Healthy living index:* In addition to individual risks and behaviors, composite indicators that  
39 assess healthy living may be more relevant in the context of multi-morbidity. Tools to assess  
40 the environment in terms of its potential to offer opportunities for healthy living have been  
41 limited, especially in LMICs. Environmental Profile of a Community's Health (EPOCH) is a  
42 quantitative tool designed to capture community perceptions of tobacco, nutrition, and social  
43 environments, validated in five countries (China, India, Brazil, Colombia, and Canada) [49, 50].  
44 EPOCH comprises an objective assessment of the physical environment, and an interviewer-  
45 administered questionnaire on residents' perceptions of their community to capture both  
46 objective and subjective measures of the environment [49]. The Community Healthy Living  
47 Index (CHLI), developed in the US assessed the environmental support potential of a  
48 community across five domains assessing a specific venue: schools, afterschool child care  
49 sites, work sites, neighborhoods, and communities-at-large [51]. Such tools could be adapted  
50 for use in LMICs.  
51  
52  
53  
54  
55  
56  
57  
58  
59  
60

## 8. Self-efficacy and social functioning

Self-efficacy and social functioning relate to social determinants of health such as age, gender, marital status, family background, employment, education level and socioeconomic status [52-58], affecting in turn how an individual is able to look after their health conditions (self-efficacy) and interact in society with other individuals leading a fulfilling life (social functioning). This raises the important question of whether indices of self-efficacy and social functioning may be suitable as outcomes measures in studies to mitigate multi-morbidity in LMIC settings.

There are limited studies that explore which social determinants are more influential than others in determining self-efficacy and social functioning. Positive personality traits and higher self-esteem demonstrated in adolescence positively affect self-efficacy [59]. Competent behaviour, such as skills of focusing on others' well-being, affiliative behaviours/interpersonal cooperation and participation, which are culturally valued and socially competent are associated with higher self-efficacy [60, 61]. Liebke and colleagues [62] reported that loneliness and social functioning are associated. Loneliness may be caused by impaired social skills, such as maintaining conversations or expressing feelings, which are essential to adequate social functioning [62]. Values placed on social determinants of health may vary across different cultures. Differences in cultural traditions may affect the sources of self-efficacy belief systems [52, 55, 56].

Given the multitude of cultural factors affecting the precursors of self-efficacy and social functioning, populations in LMICs may have fewer opportunities to develop such skills. Therefore, whilst measures of self-efficacy and social functioning could be used as multi-morbidity outcome measure in LMIC, a single index is unlikely to be useful across all settings.

## Conclusions

The case has been made for the growing global importance of multi-morbidity, the need for pragmatic intervention studies to reduce the risk of developing multi-morbidity in LMIC settings, and of mitigating the complications and progression of multi-morbidity. One of many challenges in such research has been the selection of appropriate outcomes measures.

We present the GACD Researchers' perspective on outcome measures suitable for multi-morbidity intervention studies in the context of LMICs. We have considered outcome measures across eight domains (Figure 1). Some represent direct measurements of clinical outcomes, whilst others represent intermediate variables on the pathway to multi-morbidity. Some measures are single, others are composite. They vary in their ease of collection and cost. It is critical to choose appropriate outcomes for the study design, cultural context and participant preference in order to demonstrate and understand the effect of an intervention, and our aim is therefore not to suggest a preference of one outcome measure over any other. Studies in multi-morbidity are necessarily diverse and thus different outcome measures will be appropriate for different study designs. As with the COSmm consensus [3], we recognize the key importance of mortality and health-related quality of life as multi-morbidity outcomes, and these are suitable for use in LMIC settings. Many other outcomes from the COSmm work, including patient-reported impacts and behaviors (such as treatment burden and self-efficacy), physical activity

1  
2  
3 and function, and health systems indicators (notably health economic indices) are also suitable  
4 for LMIC settings, though in the context and with the caveats that we have described above.  
5 Some of the challenges applying these outcome measures in LMIC are also relevant in HIC.  
6  
7

8 The diversity of outcome measures across domains demonstrated here should provide a useful  
9 summary for researchers, and encourage the use of multiple domains in multi-morbidity  
10 research, rather than just a single outcome measure. Ultimately, the proof of utility for these  
11 outcome measures will be the demonstration that an effective multi-morbidity intervention can  
12 improve the health of the community in which it is tested. Meanwhile, there remains the urgent  
13 need for further study and development of outcome measures suitable for multi-morbidity  
14 intervention studies in the context of LMIC.  
15  
16

17 There are limitations to this work, which is not intended to be a core outcome set, nor a  
18 systematic review. Development of both these would be an important contribution to the field,  
19 as would further work to understand the perceptions of these outcome measures from people  
20 directly affected by multi-morbidity and tools suitable for assessing patient-reported experience  
21 in the context of multi-morbidity. Here, we present a critical, narrative synthesis describing the  
22 range of outcome measures that might be selected for use in such settings, and their  
23 challenges. The key strength of our work is the broad representation of views from GACD  
24 researchers who have considerable collective experience of implementation science research in  
25 LMIC settings. We anticipate this will be useful to other researchers designing and conducting  
26 such studies, and to provoke debate and progress in the field.  
27  
28  
29  
30  
31

## 32 **Figure Legend**

33  
34  
35 **FIGURE 1:** *Eight domains of outcome measures for multi-morbidity interventions in LMIC.*  
36  
37

## 38 **Data Availability**

39 No additional data available.  
40  
41  
42  
43  
44  
45  
46  
47  
48  
49  
50  
51  
52  
53  
54  
55  
56  
57  
58  
59  
60

## References

1. Academy of Medical Sciences. Multimorbidity: a priority for global health research: Full report. Available at <https://acmedsci.ac.uk/policy/policy-projects/multimorbidity> last accessed 26th April 2020.
2. Academy of Medical Sciences. Advancing research to tackle multimorbidity: the UK and LMIC perspectives workshop report. Available at <https://acmedsci.ac.uk/policy/policy-projects/multimorbidity> last accessed 26th April 2020.
3. Smith SM, Wallace E, Salisbury C, Sasseville M, Bayliss E, Fortin M. A Core Outcome Set for Multimorbidity Research (COSmm). *Ann Fam Med*. 2018 Mar;16(2):132-138.
4. Hurst JR, Dickhaus J, Maulik PK, Miranda JJ, Pastakia SD, Soriano JB, Siddharthan T, Vedanthan R; GACD Multi-Morbidity Working Group. Global Alliance for Chronic Disease researchers' statement on multimorbidity. *Lancet Glob Health*. 2018 Dec;6(12):e1270-e1271.
5. Vaanholt MCW, Kok MM, von Birgelen C, Weernink MGM, van Til JA. Are component endpoints equal? A preference study into the practice of composite endpoints in clinical trials. *Health Expect*. 2018 Dec;21(6):1046-1055. doi: 10.1111/hex.12798. Epub 2018 Aug 14. PubMed PMID: 30109764; PubMed Central PMCID: PMC6250862.
6. van Summeren JJ, Schuling J, Haaijer-Ruskamp FM, Denig P. Outcome prioritisation tool for medication review in older patients with multimorbidity: a pilot study in general practice. *Br J Gen Pract*. 2017 Jul;67(660):e501-e506. doi: 10.3399/bjgp17X690485. Epub 2017 Mar 27. PubMed PMID: 28347987; PubMed Central PMCID: PMC5565860.
7. Fried TR, Tinetti M, Agostini J, Iannone L, Towle V. Health outcome prioritization to elicit preferences of older persons with multiple health conditions. *Patient Educ Couns*. 2011 May;83(2):278-82. doi: 10.1016/j.pec.2010.04.032. Epub 2010 May 31. PubMed PMID: 20570078; PubMed Central PMCID: PMC2945432.
8. WHO. Verbal autopsy standards: ascertaining and attributing causes of death. Available at <https://www.who.int/healthinfo/statistics/verbalautopsystandards/en/> last accessed 26th April 2020.
9. Garvey J, Connolly D, Boland F, Smith SM. OPTIMAL, an occupational therapy led self-management support programme for people with multimorbidity in primary care: a randomized controlled trial. *BMC Family Practice* 2015;16:59.
10. Giltin LN, Hauck WW, Dennis MP, Winter L, Hodgson N, Schinfeld S. Long-term effect on mortality of a home intervention that reduces functional difficulties in older adults: Results from a randomized trial. *Journal of the American Geriatrics Society* 2009;57(3):476-81.

- 1  
2  
3 11. Gitlin LN, Winter L, Dennis MP, Corcoran M, Schinfeld S, Hauck WW. A randomized trial of  
4 a multicomponent home intervention to reduce functional difficulties in older adults. *Journal of*  
5 *the American Geriatrics Society* 2006;54(5):809-16.  
6  
7
- 8 12. Linton MJ, Dieppe P, Medina-Lara A. Review of 99 self-report measures for assessing  
9 well-being in adults: exploring dimensions of well-being and developments over time. *BMJ*  
10 *Open*. 2016;6(7):e010641.  
11
- 12 13. Dolan P. Modeling valuations for EuroQol health states. *Med Care*. 1997;35(11):1095–  
13 1108.  
14
- 15 14. Jenkinson C, Coulter A, Wright L. Short form 36 (SF36) health survey questionnaire:  
16 normative data for adults of working age. *BMJ*. 1993;306(6890):1437–1440.  
17 doi:10.1136/bmj.306.6890.1437.  
18
- 19 15. Skevington SM, Lotfy M, O'Connell KA; WHOQOL Group. The World Health Organization's  
20 WHOQOL-BREF quality of life assessment: psychometric properties and results of the  
21 international field trial. A report from the WHOQOL group. *Qual Life Res*. 2004;13(2):299–310.  
22 doi:10.1023/B:QURE.0000018486.91360.00.  
23
- 24 16. Fairall L, Petersen I, Zani B, Folb N, Georgeu-Pepper D, Selohilwe O, Petrus R, Mntambo  
25 N, Bhana A, Lombard C and Bachmann M. Collaborative care for the detection and  
26 management of depression among adults receiving antiretroviral therapy in South Africa: study  
27 protocol for the CobALT randomised controlled trial. *Trials* 2018;19(1), p.193.  
28
- 29 17. Petersen I, Bhana A, Folb N, Thornicroft G, Zani B, Selohilwe O, Petrus R, Mntambo N,  
30 Georgeu-Pepper D, Kathree T and Lund C. Collaborative care for the detection and  
31 management of depression among adults with hypertension in South Africa: study protocol for  
32 the PRIME-SA randomised controlled trial. *Trials* 2018;19(1), p.192.  
33
- 34 18. Gray WK, Richardson J, McGuire J, Dewhurst F, Elder V, Weeks J, Walker RW, Dotchin  
35 CL. Frailty screening in low-and middle-income countries: A systematic review. *Journal of the*  
36 *American Geriatrics Society* 2016;64(4), pp.806-823.  
37
- 38 19. Fried LP, Tangen CM, Walston J et al. Frailty in older adults: Evidence for a phenotype. *J*  
39 *Gerontol A Biol Sci Med Sci* 2001;56A:M146–M156.  
40
- 41 20. van Boven JFM, van de Hei SJ, Sadatsafavi M. Making sense of cost-effectiveness  
42 analyses in respiratory medicine: a practical guide for non-health economists. *Eur Respir J*.  
43 2019;53:3.  
44
- 45 21. Marseille E, Larson B, Kazi DS, Kahnd JG, Rosen S. Thresholds for the cost–effectiveness  
46 of interventions: alternative approaches. *Bull World Health Organ* 2015;93:118–124.  
47  
48  
49  
50  
51  
52  
53  
54  
55  
56  
57  
58  
59  
60

- 1  
2  
3 22. Arokiasamy *et al.* The impact of multimorbidity on adult physical and mental health in low  
4 and middle income countries: what does the study on global ageing and adult health (SAGE)  
5 reveal? *BMC Medicine* (2015) 13:178.  
6  
7  
8 23. Lee JT, Hamid F, Pati S, Atun R, Millett C (2015) Impact of Noncommunicable Disease  
9 Multimorbidity on Healthcare Utilisation and Out-Of-Pocket Expenditures in Middle-Income  
10 Countries: Cross Sectional Analysis. *PLoS ONE* 10(7):  
11 e0127199.doi:10.1371/journal.pone.0127199.  
12  
13  
14 24. Cookson R, Asaria M, Ali S, Ferguson B, Fleetcroft R, Goddard M, et al. Health Equity  
15 Indicators for the English NHS: a longitudinal whole-population study at the small-area level.  
16 *Health Serv Deliv Res* 2016;4(26).  
17  
18  
19 25. Rijken M, Hujala A, van Ginneken E, Melchiorre MG, Groenewegen P, Schellevis F.  
20 Managing multimorbidity: Profiles of integrated care approaches targeting people with multiple  
21 chronic conditions in Europe. *Health Policy*. 2018 Jan;122(1):44-52.  
22  
23  
24 26. Boerma T, Eozenou P, Evans D, Evans T, Kieny MP, Wagstaff A. Monitoring progress  
25 towards universal health coverage at country and global levels. *PLoS Med*.  
26 2014;11(9):e1001731. Published 2014 Sep 22. doi:10.1371/journal.pmed.1001731.  
27  
28  
29 27. GBD 2015 Healthcare Access and Quality Collaborators. Healthcare Access and Quality  
30 Index based on mortality from causes amenable to personal health care in 195 countries and  
31 territories, 1990-2015: a novel analysis from the Global Burden of Disease Study 2015. *Lancet*.  
32 2017 Jul 15;390(10091):231-266.  
33  
34  
35 28. Mair FS, May CR. Thinking about the burden of treatment. *BMJ : British Medical Journal*  
36 2014; 349: g6680.  
37  
38  
39 29. Leppin AL, Montori VM, Gionfriddo MR. Minimally Disruptive Medicine: A Pragmatically  
40 Comprehensive Model for Delivering Care to Patients with Multiple Chronic Conditions.  
41 *Healthcare (Basel, Switzerland)* 2015; 3(1): 50-63.  
42  
43  
44 30. Eton DT, Ridgeway JL, Egginton JS, et al. Finalizing a measurement framework for the  
45 burden of treatment in complex patients with chronic conditions. *Patient related outcome*  
46 *measures* 2015; 6: 117-26.  
47  
48  
49 31. Eton DT, Yost KJ, Lai J-s, et al. Development and validation of the Patient Experience with  
50 Treatment and Self-management (PETS): a patient-reported measure of treatment burden.  
51 *Quality of Life Research* 2017; 26(2): 489-503.  
52  
53  
54 32. Tran V-T, Montori VM, Eton DT, Baruch D, Falissard B, Ravaud P. Development and  
55 description of measurement properties of an instrument to assess treatment burden among  
56 patients with multiple chronic conditions. *BMC Medicine* 2012; 10(1): 68.  
57  
58  
59  
60



- 1  
2  
3  
4 33. Déruaz-Luyet A, Goran AA, Tandjung R, et al. Multimorbidity in primary care: protocol of a  
5 national cross-sectional study in Switzerland. *BMJ Open* 2015; 5(10): e009165.  
6  
7  
8 34. Tran V-T, Messou E, Mama Djima M, Ravaud P, Ekouevi DK. Patients' perspectives on  
9 how to decrease the burden of treatment: a qualitative study of HIV care in sub-Saharan Africa.  
10 *BMJ Quality & Safety* 2019; 28(4): 266.  
11  
12  
13 35. Duncan P, Murphy M, Man M-S, Chaplin K, Gaunt D, Salisbury C. Development and  
14 validation of the Multimorbidity Treatment Burden Questionnaire (MTBQ). *BMJ Open* 2018; 8(4):  
15 e019413.  
16  
17  
18 36. Boyd CM, Wolff JL, Giovannetti E, et al. Healthcare task difficulty among older adults with  
19 multimorbidity. *Medical care* 2014; 52 Suppl 3: S118-25.  
20  
21  
22 37. Gibbons CJ, Kenning C, Coventry PA, et al. Development of a Multimorbidity Illness  
23 Perceptions Scale (MULTIPlES). *PLOS ONE* 2013; 8(12): e81852.  
24  
25 38. Matima R, Murphy K, Levitt NS, BeLue R, Oni T. A qualitative study on the experiences and  
26 perspectives of public sector patients in Cape Town in managing the workload of demands of  
27 HIV and type 2 diabetes multimorbidity. *PLoS One*. 2018;13(3):e0194191. Published 2018 Mar  
28 14. doi:10.1371/journal.pone.0194191.  
29  
30  
31 39. Birkhäuer J, Gaab J, Kossowsky J, et al. Trust in the health care professional and health  
32 outcome: A meta-analysis. *PLoS One*. 2017;12(2):e0170988.  
33  
34  
35 40. Naska A, Lagiou A, Lagiou P. Dietary assessment methods in epidemiological research:  
36 current state of the art and future prospects. *F1000Res*. 2017 Jun 16;6:926.  
37  
38  
39 41. Shim JS, Oh K, Kim HC. Dietary assessment methods in epidemiologic studies. *Epidemiol*  
40 *Health*. 2014 Jul 22;36:e2014009.  
41  
42 42. de Oliveira Otto MC, Anderson CAM, Dearborn JL, Ferranti EP, Mozaffarian D, Rao G,  
43 Wylie-Rosett J, Lichtenstein AH; American Heart Association Behavioral Change for Improving  
44 Health Factors Committee of the Council on Lifestyle and Cardiometabolic Health and Council  
45 on Epidemiology and Prevention; Council on Cardiovascular and Stroke Nursing; Council on  
46 Clinical Cardiology; and Stroke Council. Dietary Diversity: Implications for Obesity Prevention in  
47 Adult Populations: A Science Advisory From the American Heart Association. *Circulation*. 2018  
48 Sep 11;138(11):e160-e168.  
49  
50  
51 43. Rathnayake KM, Madushani P, Silva K. Use of dietary diversity score as a proxy indicator  
52 of nutrient adequacy of rural elderly people in Sri Lanka. *BMC Res Notes*. 2012 Aug 29;5:469.  
53  
54  
55  
56  
57  
58  
59  
60

- 1  
2  
3 44. Walls HL, Johnston D, Mazalale J, Chirwa EW. Why we are still failing to measure the  
4 nutrition transition. *BMJ Glob Health*. 2018 Feb 21;3(1):e000657.  
5  
6  
7 45. Barr AL, Young EH, Sandhu MS. Objective measurement of physical activity: improving the  
8 evidence base to address non-communicable diseases in Africa. *BMJ Glob Health*. 2018 Oct  
9 8;3(5):e001044.  
10  
11 46. Koyanagi A, Stubbs B, Vancampfort D. Correlates of sedentary behavior in the general  
12 population: A cross-sectional study using nationally representative data from six low- and  
13 middle-income countries. *PLoS One*. 2018 Aug 10;13(8):e0202222.  
14  
15 47. Vancampfort D, Stubbs B, Koyanagi A. Physical chronic conditions, multimorbidity and  
16 sedentary behavior amongst middle-aged and older adults in six low- and middle-income  
17 countries. *Int J Behav Nutr Phys Act*. 2017 Oct 27;14(1):147.  
18  
19 48. STEPwise approach to surveillance – available at:  
20 <https://www.who.int/ncds/surveillance/steps/en/> last accessed 26<sup>th</sup> April 2020.  
21  
22  
23 49. Chow CK, Lock K, Madhavan M, Corsi DJ, Gilmore AB, Subramanian SV, Li W,  
24 Swaminathan S, Lopez-Jaramillo P, Avezum A, Lear SA, Dagenais G, Teo K, McKee M, Yusuf  
25 S. Environmental Profile of a Community's Health (EPOCH): an instrument to measure  
26 environmental determinants of cardiovascular health in five countries. *PLoS One*. 2010 Dec  
27 10;5(12):e14294.  
28  
29 50. Corsi DJ, Subramanian SV, McKee M, Li W, Swaminathan S, Lopez-Jaramillo P, Avezum  
30 A, Lear SA, Dagenais G, Rangarajan S, Teo K, Yusuf S, Chow CK. Environmental Profile of a  
31 Community's Health (EPOCH): an ecometric assessment of measures of the community  
32 environment based on individual perception. *PLoS One*. 2012;7(9):e44410.  
33  
34 51. Kim S, Adamson KC, Balfanz DR, Brownson RC, Wiecha JL, Shepard D, Alles WF.  
35 Development of the Community Healthy Living Index: a tool to foster healthy environments for  
36 the prevention of obesity and chronic disease. *Prev Med*. 2010 Jan;50 Suppl 1:S80-5.  
37  
38 52. Hur MH. Demographic and Socioeconomic Determinants of Self-Efficacy: An Empirical  
39 Study of Korean Older Adults. *Int J Aging Hum Dev*. 2018;87(3):289-308.  
40  
41 53. Callander EJ, Schofield DJ. Impact of multidimensional poverty on the self-efficacy of older  
42 people: Results from an Australian longitudinal study. *Geriatr Gerontol Int*. 2017;17(2):308-14.  
43  
44 54. Kollia N, Caballero FF, Sanchez-Niubo A, Tyrovolas S, Ayuso-Mateos JL, Haro JM, et al.  
45 Social determinants, health status and 10-year mortality among 10,906 older adults from the  
46 English longitudinal study of ageing: the ATHLOS project. *BMC Public Health*. 2018;18(1):1357.  
47  
48  
49  
50  
51  
52  
53  
54  
55  
56  
57  
58  
59  
60

- 1  
2  
3 55. Qian H, Yuan C. Factors associated with self-care self-efficacy among gastric and  
4 colorectal cancer patients. *Cancer Nurs*. 2012;35(3):E22-31.  
5  
6  
7 56. Schnell-Hoehn KN, Naimark BJ, Tate RB. Determinants of self-care behaviors in  
8 community-dwelling patients with heart failure. *J Cardiovasc Nurs*. 2009;24(1):40-7.  
9  
10 57. Baheiraei A, Bakouei F, Mohammadi E, Montazeri A, Hosseni M. The Social Determinants  
11 of Health in Association with Women's Health Status of Reproductive Age: A Population-Based  
12 Study. *Iran J Public Health*. 2015;44(1):119-29.  
13  
14  
15 58. Walker RJ, Gebregziabher M, Martin-Harris B, Egede LE. Independent effects of  
16 socioeconomic and psychological social determinants of health on self-care and outcomes in  
17 Type 2 diabetes. *Gen Hosp Psychiatry*. 2014;36(6):662-8.  
18  
19  
20 59. Caprara GV, Vecchione M, Alessandri G, Gerbino M, Barbaranelli C. The contribution of  
21 personality traits and self-efficacy beliefs to academic achievement: a longitudinal study. *Br J*  
22 *Educ Psychol*. 2011;81(Pt 1):78-96.  
23  
24  
25 60. Di Giunta L, Eisenberg N, Kupfer A, Steca P, Tramontano C, Caprara GV. Assessing  
26 Perceived Empathic and Social Self-Efficacy Across Countries. *Eur J Psychol Assess*.  
27 2010;26(2):77-86.  
28  
29  
30 61. van der Slot WM, Nieuwenhuijsen C, van den Berg-Emons RJ, Wensink-Boonstra AE,  
31 Stam HJ, Roebroek ME. Participation and health-related quality of life in adults with spastic  
32 bilateral cerebral palsy and the role of self-efficacy. *J Rehabil Med*. 2010;42(6):528-35.  
33  
34  
35 62. Liebke L, Bungert M, Thome J, Hauschild S, Gescher DM, Schmahl C, et al. Loneliness,  
36 social networks, and social functioning in borderline personality disorder. *Personal Disord*.  
37 2017;8(4):349-56.  
38  
39  
40

## Contributorship

41  
42 The concept for this paper arose from discussion at the GACD Multi-Morbidity Working Group  
43 chaired by JRH. The authors (JRH, GA, JFMvB, MD, GSG, EW-CH, PKM, JJM, MOO, SSP,  
44 JBS, RV, LLY and NSL) planned and conducted the e-mail survey. All authors and contributors  
45 (RA, KB, NHS, FXG-O, SJ, BJK, RMJJvdK, MMK, LL-D, PL-J, SN, JvO, GP, TS, KS, NS, ACT)  
46 provided suggestions for outcome measures. Individual sections of the manuscript were drafted  
47 by the authors, coordinated by JRH into a first complete draft. All authors revised this initial  
48 draft. All authors and contributors provided important intellectual content on the revised draft  
49 and approved the final version for submission.  
50  
51  
52  
53  
54  
55  
56  
57  
58  
59  
60

1  
2  
3  
4  
5  
6  
7  
8  
9  
10  
11  
12  
13  
14  
15  
16  
17  
18  
19  
20  
21  
22  
23  
24  
25  
26  
27  
28  
29  
30  
31  
32  
33  
34  
35  
36  
37  
38  
39  
40  
41  
42  
43  
44  
45  
46  
47  
48  
49  
50  
51  
52  
53  
54  
55  
56  
57  
58  
59  
60

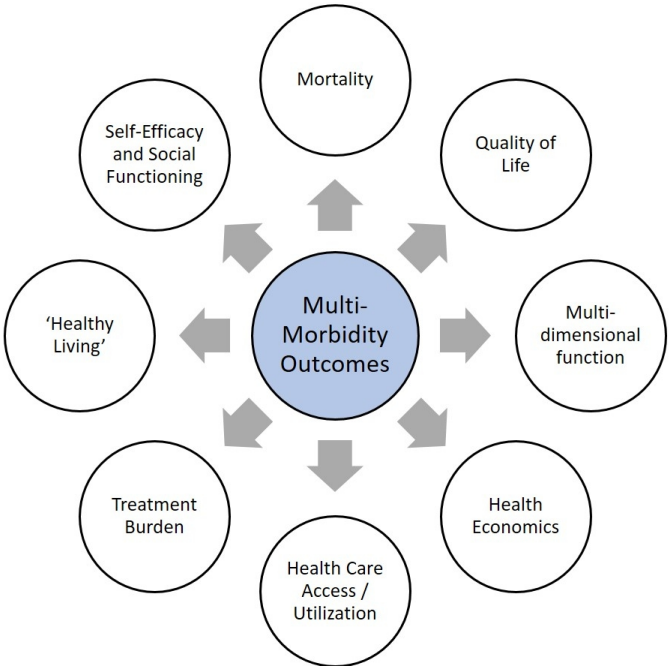

FIGURE 1: Eight domains of outcome measures for multi-morbidity interventions in LMIC.

84x56mm (400 x 400 DPI)
